# Supplementary material for: Arf GTPase activates the WAVE regulatory complex through a distinct binding site
Source: PubMed Central journal article supplement — Sci Adv. 2022 Dec 14;8(50):eadd1412. doi: 10.1126/sciadv.add1412 (PMC9750158; doi:10.1126/sciadv.add1412), 2022-12-14
Supplement: sciadv.add1412_sm.pdf [file sciadv.add1412_sm.pdf]

Supplementary Materials for

**Arf GTPase activates the WAVE regulatory complex through a distinct binding site**

Sheng Yang *et al.*

Corresponding author: Klemens Rottner, [klemens.rottner@helmholtz-hzi.de](mailto:klemens.rottner@helmholtz-hzi.de); Baoyu Chen, [stone@iastate.edu](mailto:stone@iastate.edu)

*Sci. Adv.* **8**, eadd1412 (2022)  
DOI: 10.1126/sciadv.add1412

**The PDF file includes:**

Figs. S1 to S6  
Tables S1 and S2  
Legends for movies S1 and S2

**Other Supplementary Material for this manuscript includes the following:**

Movies S1 and S2

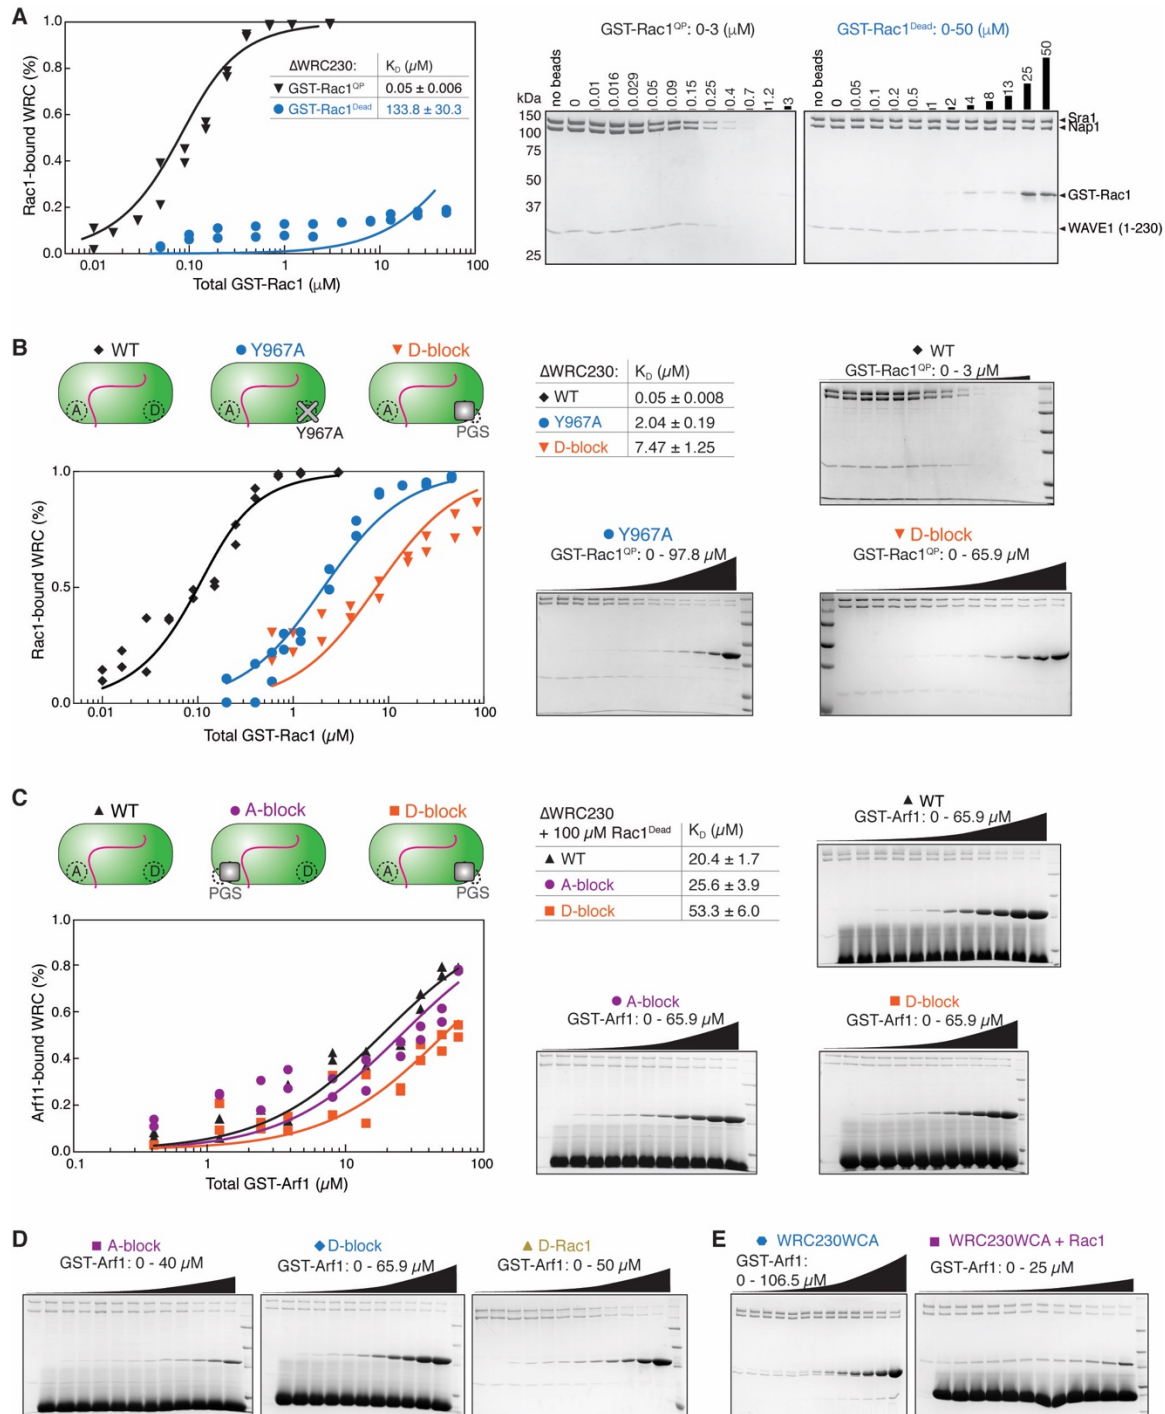

**Fig. S1. Supporting EPD data for Fig. 1, 2, and 3. (A)** EPD measurement, including quantification and representative Coomassie blue-stained SDS PAGE gels, showing GST-Rac1<sup>Dead</sup> does not bind to WRC. **(B)** EPD measurement showing that, compared to the Y967A mutation, D-block further reduces potential leaky binding of Rac1 to the D site. **(C)** EPD measurement showing

that blocking the A site or the D site does not significantly affect the basal level binding of Arf1 to WRC. **(D-E)** Example EPD gels for Fig. 2B and 3B, respectively.

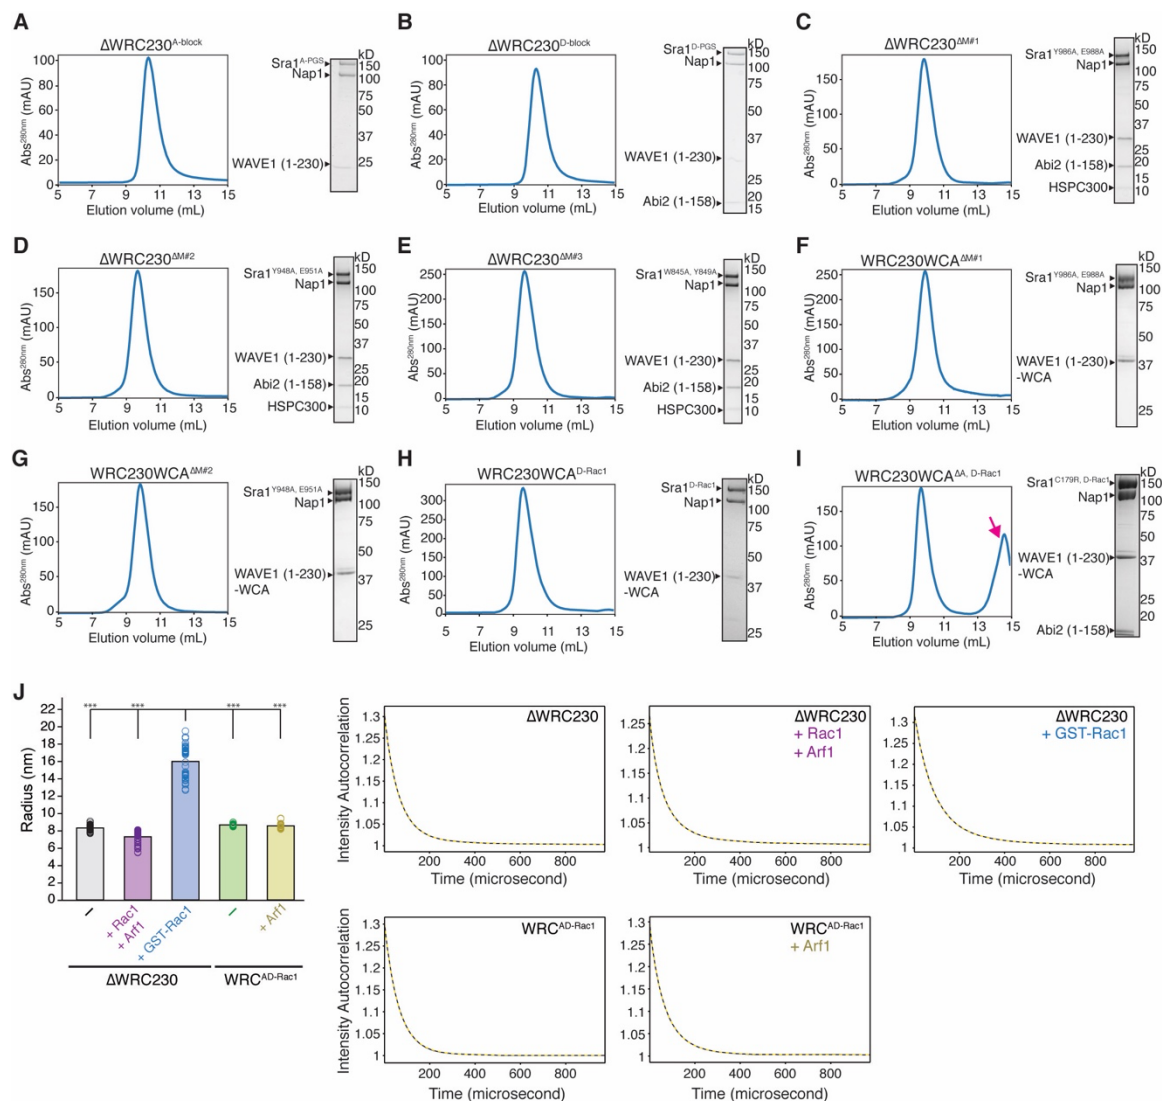

**Fig. S2. Quality control of the WRCs newly developed in this study.** (A-I) Shown are the final steps or analytical steps of WRC purifications using 24-ml Superdex 200 gel filtration columns, with Coomassie blue-stained SDS-PAGE gels showing the peak or pooled fractions. Depending on whether the preceding purification step included a Source Q15 ion exchange column, different amounts of Tev and cleaved MBP tag may show as clearly separated peaks (indicated by magenta arrow) following the WRC peak. (J) Dynamic Light Scattering (DLS) measurements of indicated WRC mixed with GTPases. GST-Rac1 is used as a positive control to show radius change when WRC is dimerized by GST-Rac1. On the left is radius values for 3.3  $\mu$ M  $\Delta$ WRC230 alone ( $n = 54$ ), 3.5  $\mu$ M  $\Delta$ WRC230 + 30  $\mu$ M Rac1<sup>QP</sup> + 125  $\mu$ M Arf1 ( $n = 44$ ), 1  $\mu$ M  $\Delta$ WRC230 + 30  $\mu$ M GST-Rac1<sup>QP</sup> ( $n = 51$ ), 5  $\mu$ M WRC<sup>AD-Rac1</sup> alone ( $n = 16$ ), and 5  $\mu$ M WRC<sup>AD-Rac1</sup> + 125  $\mu$ M Rac1<sup>QP</sup> ( $n = 24$ ).  $n$  equals total number of acquisitions, \*\*\* indicates  $p < 0.001$ , ANOVA test. Radius

values are reported as the average values from all requisitions. All experiments were collected in 50-100 mM NaCl and 5% (w/v) glycerol and at room temperature. The slightly reduced radius for  $\Delta$ WRC230 + Rac1 + Arf1 sample was likely due to the addition of large amounts of Rac1 and Arf1, which have lower molecular weight. On the right is a representative plot of intensity autocorrelation (black solid curve) and the regularization fit (yellow dashed curve) for each experiment.

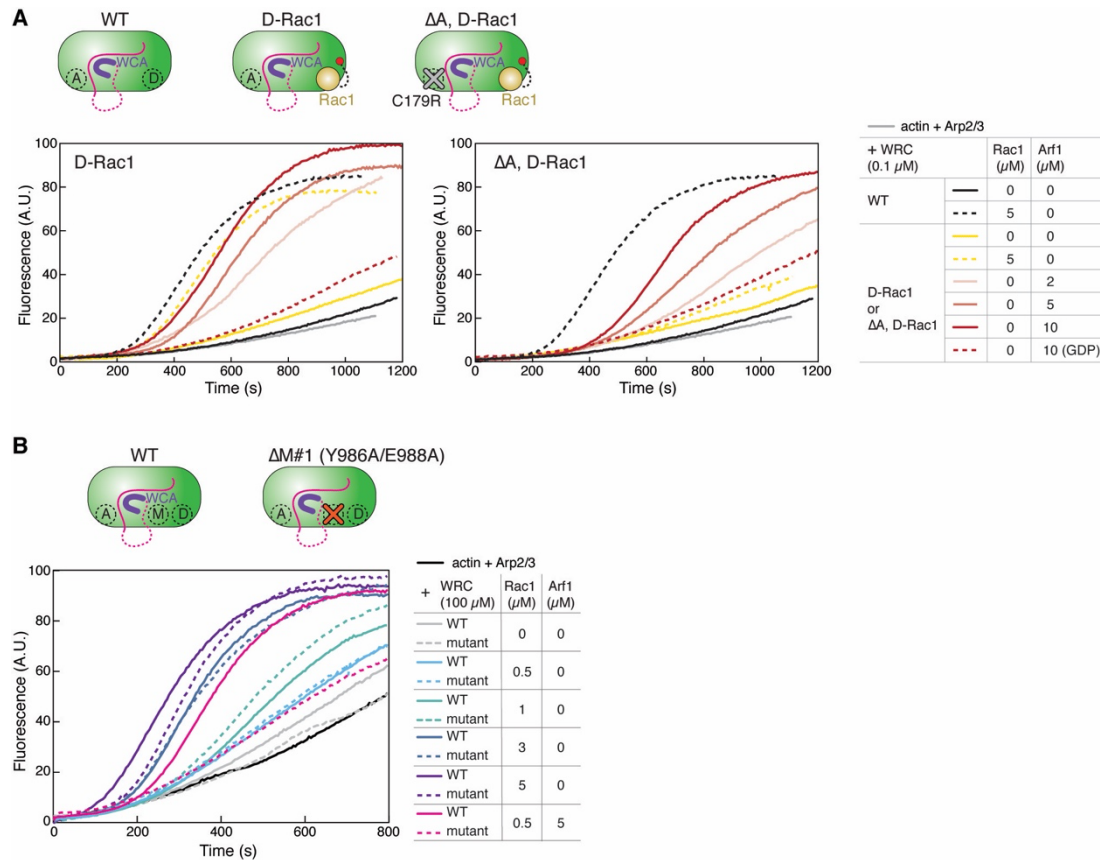

**Fig. S3. Additional actin polymerization assays comparing Arf1- vs. Rac1-mediated WRC activation. (A-B)** Pyrene-actin polymerization assays comparing indicated WRC variants in response to the addition of free Rac1<sup>QP</sup> or Arf1. WT WRC230WCA is used as a reference point. Reactions contained 3.5 μM actin (5% pyrene labeled), 10 nM Arp2/3 complex, 100 nM indicated WRC, and indicated amounts of Rac1<sup>QP</sup> and/or Arf1. In all assays, Arf1 is loaded with GNPPNP, unless it is designated with GDP.

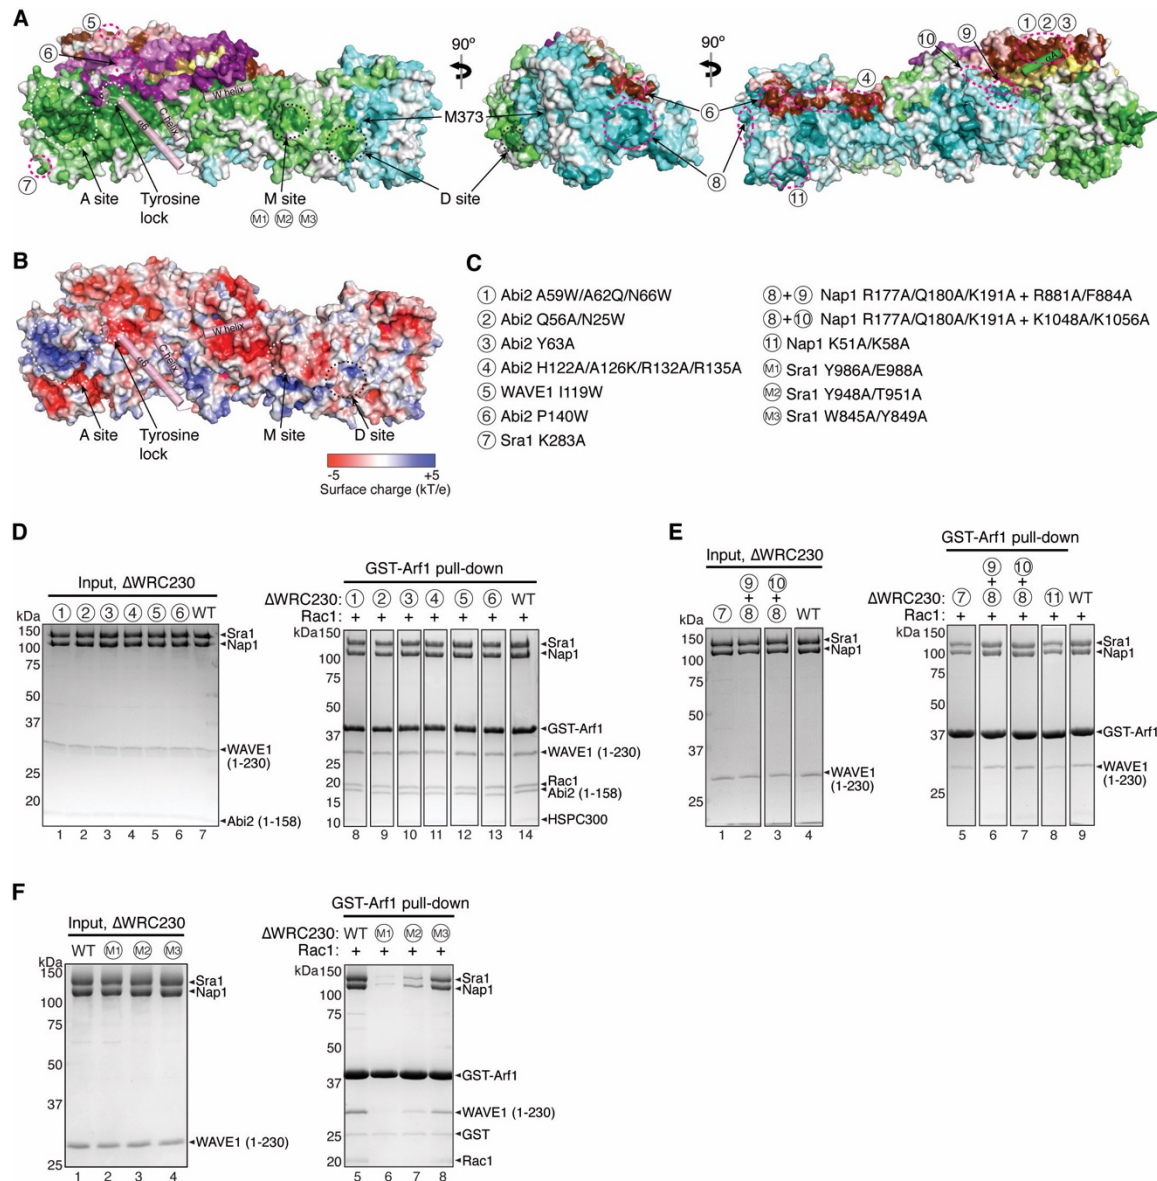

**Fig. S4. Surveying various conserved surfaces on WRC to identify the Arf1-binding site. (A-B)** Surface conservation (A) and electrostatic charge (B) representation of the WRC. (A) was calculated by ConSurf (61), and (B) by APBS in Pymol (85). In (A), color to white gradients represent the most conserved surface residues (ConSurf score = 9 for darkest colors) to the least conserved residues (ConSurf score = 1 for white color). Important sites on Sra1, including the identified Arf1 binding site (M site), are indicated with white or black dotted circles. Positions of mutations examined in (D-F) are indicated with magenta dotted circles. Semitransparent pink cylinders refer to the sequences in WAVE1 that are destabilized upon WRC activation by Rac1. The  $\alpha$ A helix in Sra1 is also shown as a semitransparent green cylinder for clarity. (C) Information

of the mutations indicated in (A) and examined in (D-F). **(D-F)** Coomassie blue-stained SDS PAGE gels showing GST-Arf1 pull-down of  $\Delta$ WRC230 carrying indicated surface mutations.



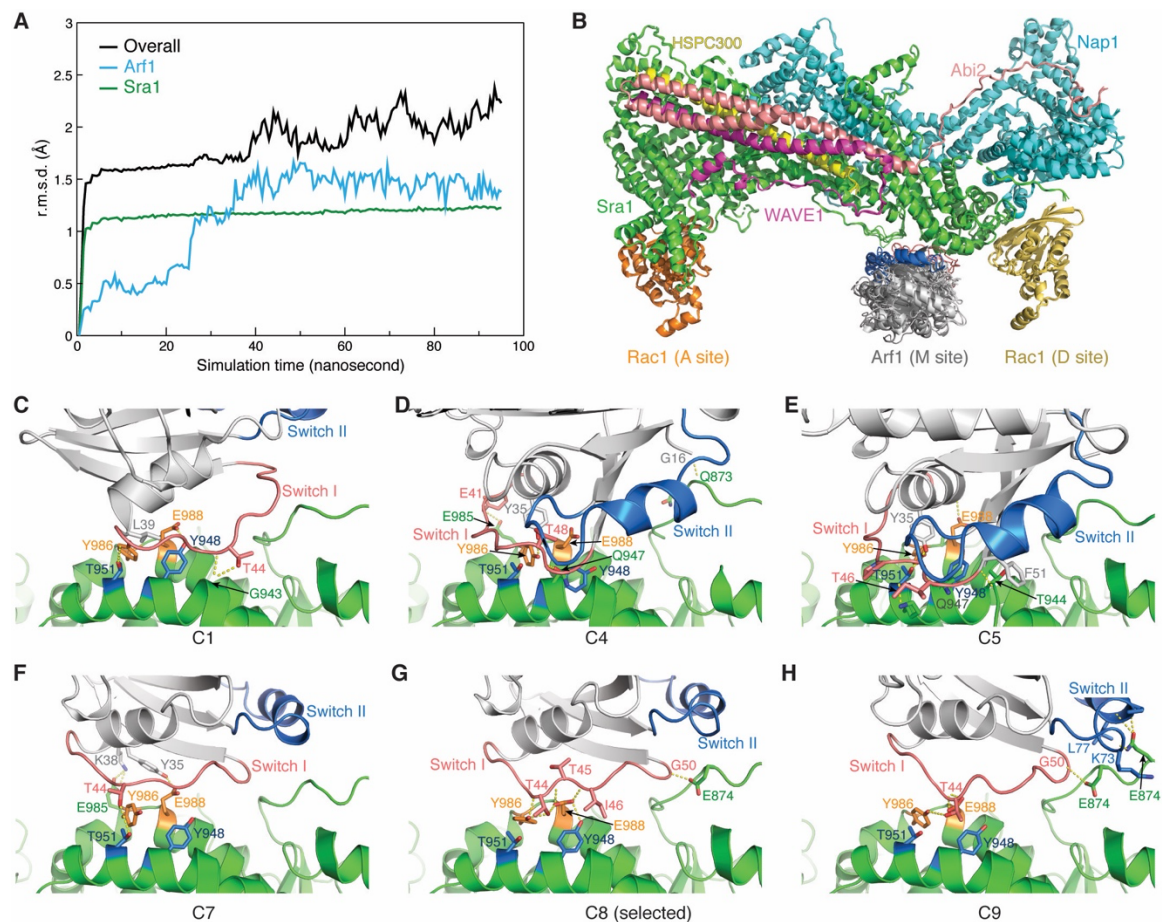

| System |          | Free energies of the whole Arf1-WRC <sup>AD-Ract</sup> complex |                   |                                   |                                      |               |                           | Free energies of Arf1 binding to WRC <sup>AD-Ract</sup> |                   |                                   |                                      |             |                           |
|--------|----------|----------------------------------------------------------------|-------------------|-----------------------------------|--------------------------------------|---------------|---------------------------|---------------------------------------------------------|-------------------|-----------------------------------|--------------------------------------|-------------|---------------------------|
| model  | mutation | E <sub>vdw</sub>                                               | E <sub>elec</sub> | G <sup>vdw</sup> <sub>total</sub> | G <sup>vdw</sup> <sub>nonpolar</sub> | TS            | G <sub>MM-PBSA-WSAS</sub> | E <sub>vdw</sub>                                        | E <sub>elec</sub> | G <sup>vdw</sup> <sub>total</sub> | G <sup>vdw</sup> <sub>nonpolar</sub> | TS          | G <sub>MM-PBSA-WSAS</sub> |
| C1     | WT       | -15569.59±6.45                                                 | -25689.81±4.53    | -9969.32±0.86                     | 694.41±0.64                          | 35791.12±0.89 | -9539.18±11.25            | -43.36±0.49                                             | 331.84±1.27       | -304.51±1.59                      | -4.25±0.02                           | -19.57±0.25 | -0.71±0.67                |
|        | ΔM#1     | -15559.76±7.33                                                 | -25771.60±0.43    | -9873.65±0.13                     | 694.98±0.45                          | 35779.34±1.93 | -9531.29±8.63             | -39.64±0.92                                             | 304.68±1.30       | -282.04±1.11                      | -3.81±0.05                           | -18.68±0.33 | -2.13±0.57                |
|        | ΔM#2     | -15560.81±7.28                                                 | -25674.19±1.04    | -9972.81±0.66                     | 694.92±0.45                          | 35782.28±1.89 | -9536.06±9.36             | -37.64±0.71                                             | 332.23±1.20       | -306.10±1.05                      | -3.89±0.04                           | -18.03±0.30 | 2.64±0.72                 |
| C4     | WT       | -15532.98±21.22                                                | -25690.78±15.42   | -9976.65±13.12                    | 692.84±0.16                          | 35780.95±0.48 | -9501.03±24.31            | -36.08±0.87                                             | 291.85±1.99       | -270.47±1.57                      | -4.13±0.09                           | -19.03±0.13 | 0.20±0.51                 |
|        | ΔM#1     | -15519.39±20.84                                                | -25756.19±15.41   | -9893.34±13.27                    | 693.32±0.17                          | 35772.16±0.47 | -9481.03±24.51            | -30.78±0.56                                             | 280.67±1.78       | -260.83±1.45                      | -3.72±0.08                           | -16.30±0.13 | 1.65±0.27                 |
|        | ΔM#2     | -15521.08±21.51                                                | -25676.08±15.32   | -9977.85±13.03                    | 693.18±0.16                          | 35773.25±0.45 | -9487.85±24.49            | -33.34±0.87                                             | 291.96±1.92       | -271.27±1.52                      | -4.05±0.09                           | -18.35±0.10 | 1.65±0.54                 |
| C5     | WT       | -15530.30±16.40                                                | -25745.00±6.63    | -9918.23±5.24                     | 689.54±0.10                          | 35776.63±1.53 | -9503.97±21.48            | -65.27±0.77                                             | 302.36±0.69       | -275.42±0.58                      | -6.74±0.08                           | -26.86±0.17 | -18.21±0.59               |
|        | ΔM#1     | -15517.55±16.21                                                | -25816.75±6.39    | -9828.87±4.95                     | 690.12±0.08                          | 35766.63±1.44 | -9483.19±21.90            | -61.05±1.00                                             | 287.15±1.01       | -261.53±0.84                      | -6.22±0.07                           | -25.09±0.19 | -16.56±0.69               |
|        | ΔM#2     | -15519.42±15.86                                                | -25727.59±6.72    | -9922.05±5.33                     | 689.94±0.09                          | 35769.63±1.49 | -9492.22±22.26            | -61.88±0.93                                             | 306.56±0.57       | -279.82±0.46                      | -6.56±0.08                           | -25.19±0.20 | -16.52±0.71               |
| C7     | WT       | -15515.32±16.65                                                | -25740.41±6.45    | -9917.68±5.14                     | 689.59±0.09                          | 35762.44±1.54 | -9494.00±21.19            | -64.96±0.73                                             | 302.46±0.69       | -275.53±0.59                      | -6.73±0.07                           | -26.86±0.17 | -17.89±0.56               |
|        | ΔM#1     | -15542.18±12.06                                                | -25776.00±12.13   | -9899.55±11.90                    | 686.19±0.21                          | 35771.98±1.90 | -9505.71±26.51            | -71.40±0.87                                             | 274.46±3.24       | -248.44±2.58                      | -9.08±0.07                           | -28.28±0.06 | -26.19±0.38               |
|        | ΔM#2     | -15529.34±12.05                                                | -25840.27±12.56   | -9815.78±12.19                    | 686.61±0.22                          | 35763.39±2.00 | -9487.10±26.59            | -66.61±0.74                                             | 260.04±3.13       | -235.37±2.75                      | -8.78±0.08                           | -26.10±0.10 | -24.62±0.23               |
| C8     | WT       | -15528.76±12.19                                                | -25771.69±12.19   | -9899.73±12.03                    | 686.28±0.22                          | 35757.17±1.90 | -9498.29±26.56            | -71.31±0.87                                             | 274.56±3.23       | -248.51±2.57                      | -9.08±0.07                           | -28.28±0.06 | -26.06±0.39               |
|        | ΔM#1     | -15572.61±26.33                                                | -25722.41±14.16   | -9942.87±9.72                     | 690.31±0.43                          | 35784.32±1.15 | <b>-9524.61±44.36</b>     | -76.97±1.61                                             | 301.80±0.32       | -272.67±0.36                      | -8.93±0.08                           | -29.31±0.36 | <b>-27.46±1.12</b>        |
|        | ΔM#2     | -15557.84±25.88                                                | -25785.51±13.42   | -9858.63±9.28                     | 690.65±0.44                          | 35776.05±1.09 | <b>-9502.55±44.63</b>     | -70.33±1.49                                             | 292.08±0.42       | -261.90±0.26                      | -8.76±0.10                           | -26.48±0.41 | <b>-22.43±0.75</b>        |
| C9     | WT       | -15559.40±26.38                                                | -25707.60±13.89   | -9944.34±9.77                     | 690.59±0.44                          | 35777.61±1.10 | <b>-9510.56±43.58</b>     | -72.47±1.28                                             | 301.15±0.31       | -272.96±0.51                      | -8.91±0.07                           | -27.81±0.35 | <b>-25.38±0.67</b>        |
|        | ΔM#1     | -15559.55±26.48                                                | -25719.08±14.21   | -9942.22±9.81                     | 690.38±0.41                          | 35769.74±1.11 | <b>-9516.65±43.91</b>     | -76.70±1.61                                             | 301.83±0.28       | -272.80±0.35                      | -8.89±0.08                           | -29.30±0.36 | <b>-27.26±1.12</b>        |
|        | ΔM#3     | -15538.55±4.49                                                 | -25794.92±11.65   | -9876.27±6.87                     | 693.73±0.23                          | 35784.20±0.72 | -9438.42±43.10            | -50.51±0.68                                             | 310.70±1.03       | -287.05±1.04                      | -5.39±0.10                           | -21.77±0.16 | -10.47±0.52               |
| C9     | WT       | -15528.50±4.59                                                 | -25864.25±11.53   | -9787.16±6.74                     | 694.10±0.21                          | 35774.96±0.66 | -9421.61±43.86            | -48.91±0.46                                             | 293.71±1.18       | -270.60±1.19                      | -5.15±0.10                           | -20.17±0.21 | -10.78±0.27               |
|        | ΔM#2     | -15526.45±4.44                                                 | -25777.97±11.56   | -9878.46±6.74                     | 693.97±0.23                          | 35777.26±0.71 | -9424.98±43.14            | -45.89±0.64                                             | 310.47±1.01       | -287.38±1.00                      | -5.39±0.10                           | -20.69±0.14 | -7.49±0.56                |
|        | ΔM#3     | -15522.34±4.68                                                 | -25790.76±11.87   | -9876.08±7.08                     | 693.97±0.23                          | 35769.97±0.77 | -9426.93±42.75            | -49.34±0.60                                             | 310.94±1.17       | -287.52±1.13                      | -5.13±0.06                           | -21.50±0.16 | -9.55±0.47                |

**Fig. S5. Molecular dynamics simulation and energy minimization of the top M-site Arf1 docking models.** (A) Root-mean-square deviation (r.m.s.d.) time course of the MD simulation of the C8 model, showing the system reached equilibrium after 30 nanoseconds. Other models showed similar r.m.s.d. time courses. (B) Overlay of all six MD energy minimized models. (C-H) Detailed view of the Arf1-M site interactions in indicated models. Sra1 is kept in the same

orientation to demonstrate different orientations of Arf1 in various MD models. Yellow dotted lines indicate polar or  $\pi$ - $\pi$  interactions. **(I)** List of MM-PBSA-WSAS energy terms of whole complex free energies (left) and Arf1-binding free energies (right) of six Arf1-WRC<sup>AD-Rac1</sup> complexes, each including the WT WRC and M-site mutants, with  $\Delta M\#1$  for Sra1<sup>Y986A/E988A</sup>,  $\Delta M\#2$  for Sra1<sup>948A/T951A</sup>, and  $\Delta M\#3$  for Sra1<sup>W845A/Y849A</sup> (as a negative control). All energy terms, including  $E_{vdw}$  and  $E_{eel}$  for the van der Waals and electrostatic interactions, respectively;  $G_{polar}^{sol}$  and  $G_{nonpolar}^{sol}$  for the polar and nonpolar parts of the solvation free energy, respectively, and TS for the entropic term, are in kcal/mol. Model C8 agreed best with the experimental results, in that  $\Delta M\#1$  and  $\Delta M\#2$ , but not  $\Delta M\#3$  mutations, increased by free energies for Arf1 binding.

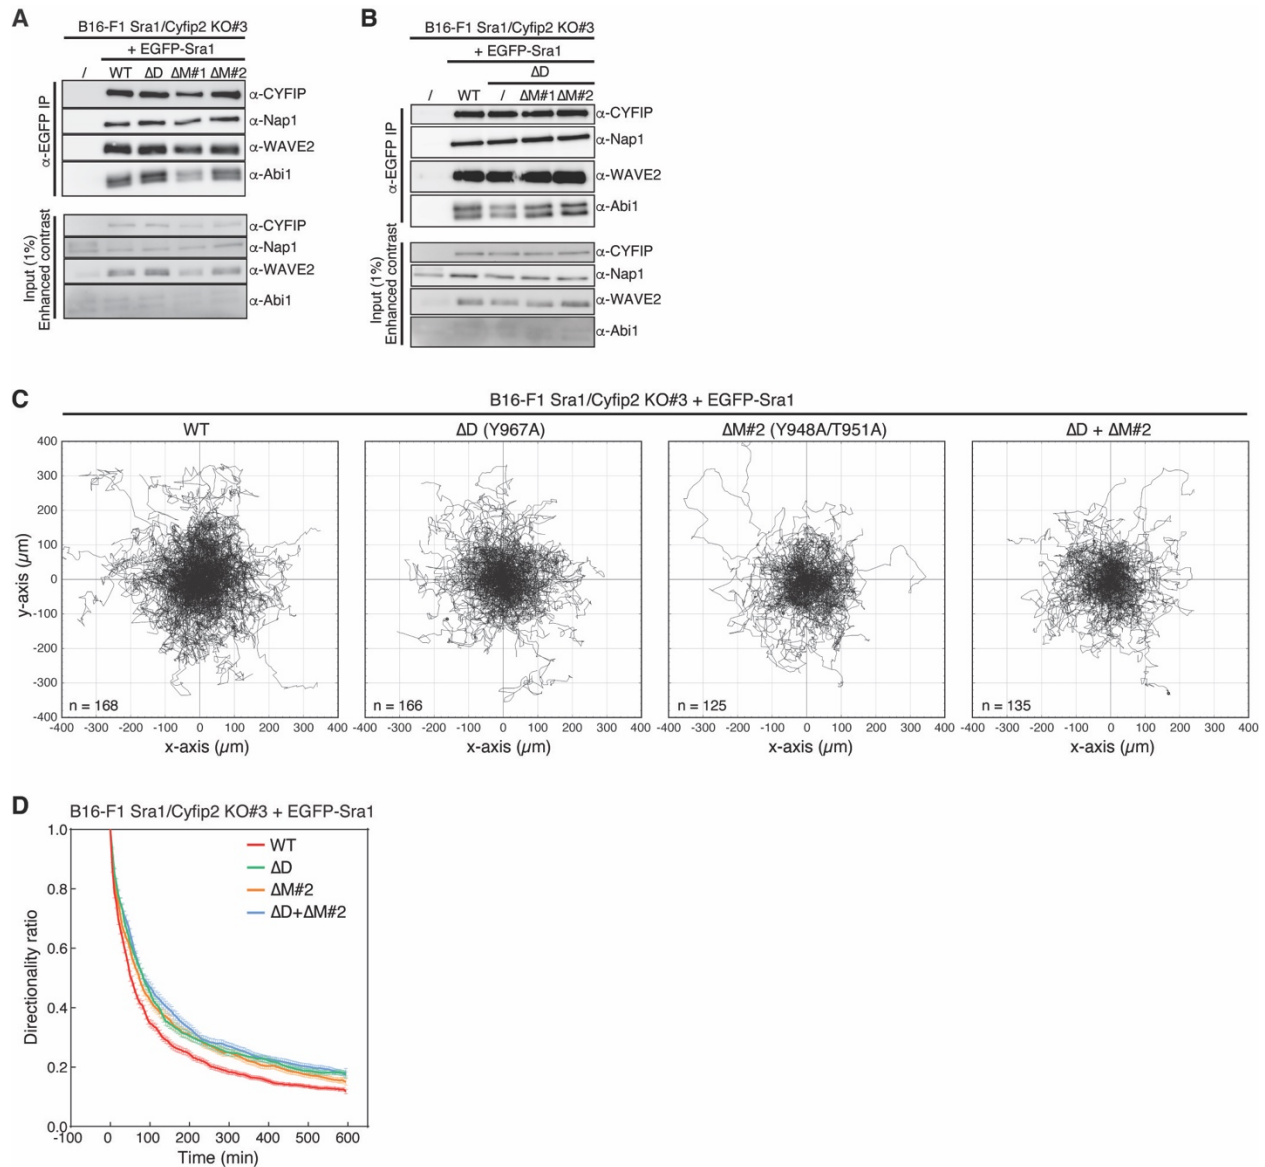

**Fig. S6. Supporting data for the cellular studies in Fig.6.** (A-B) Immunoprecipitation (IP) and Western blot of the same B16-F1 *Sra1/CYFIP2* double KO#3 cells used in Fig. 6. The cells were transfected with indicated EGFP-tagged Sra1 variants, lysed, and probed for the expression and assembly of WRC, as exemplified by CYFIP (for both Sra1 and Cyfp2), Nap1, WAVE2, and Abi1. (C) Trajectory plots of *Sra1/Cyfp2* KO#3 cells rescued with EGFP-Sra1 WT and indicated variants and subjected to random cell migration assays. “n” equals to number of cell trajectories analyzed. Migration rates derived from trajectory analyses are shown in Fig. 6L. (D) Analysis of migration directionality of indicated Sra1-rescued cells by showing directionality ratios over elapsed time. Data are from the same cells as used in Fig. 6M. Compared to the directionality ratio at the last point of trajectory shown in Fig. 6M, this figure displays the directionality ratios of

migration trajectories at all measured time points throughout the entire migration process. Solid curves are arithmetic means of directionality ratios at given time points of all measured cells, while error bars are standard error of means.

**Table S1. DNA constructs and WRC assemblies used in this study**

| Name                                | Description                                                                                                                                                                                                | Source/reference | Identifier            |
|-------------------------------------|------------------------------------------------------------------------------------------------------------------------------------------------------------------------------------------------------------|------------------|-----------------------|
| <b>Individual proteins/subunits</b> |                                                                                                                                                                                                            |                  |                       |
| Sra1                                | His6-Tev-hSra1 (1-1253, full length) in pAV5a vector, His6-Tev finally removed                                                                                                                             | (35)             | pYS1                  |
| Sra1 <sup>D-Rac1</sup>              | His6-Tev-Sra1-(GGG) <sub>4</sub> -Rac1 <sup>Q61L/P29S</sup> (1-188) in pAV5a vector, His6-Tev finally removed                                                                                              | (46)             | pYS11                 |
| Sra1 <sup>A-Rac1</sup>              | His6-Tev-Sra1 Y423-[(GGG) <sub>6</sub> -Rac1 <sup>Q61L/P29S</sup> (1-188)-(GS) <sub>6</sub> ]-S424 (Rac1 is inserted in a loop of Sra1 between Y423/S424), in pAV5a vector, His6-Tev finally removed       | This study       | pYS88                 |
| Sra1 <sup>Y986A, E988A</sup>        | 986A, E988A in Sra1 ( $\Delta$ M#1)                                                                                                                                                                        | This study       | pYS197                |
| Sra1 <sup>Y948A, T951A</sup>        | Y948A, T951A in Sra1 ( $\Delta$ M#2)                                                                                                                                                                       | This study       | pYS198                |
| Sra1 <sup>W845A, Y849A</sup>        | W845A, Y849A in Sra1 ( $\Delta$ M#3)                                                                                                                                                                       | This study       | pYS199                |
| Sra1 <sup>D-PGS</sup>               | His6-Tev-Sra1 H965-(G)-PGS-(G)-G968 (PGS is inserted between H965 and G968, with E966 and Y967 replaced by Gly), in pAV5a vector, His6-Tev finally removed (D-block)                                       | This study       | pYS110                |
| Sra1 <sup>A-PGS</sup>               | His6-Tev-Sra1 K178-(G)-PGS-(G)-S180 (PGS is inserted between K178 and S180, with C179 replaced by Gly. An extra Gly is tethered to C terminus of PGS), in pAV5a vector, His6-Tev finally removed (A-block) | This study       | pYS112                |
| Sra1 <sup>Y967A</sup>               | Y967A in Sra1 ( $\Delta$ D)                                                                                                                                                                                | (41)             | cbyd-150807-3 (AT3-1) |
| Sra1 <sup>C179R</sup>               | C179R in Sra1 ( $\Delta$ A)                                                                                                                                                                                | (36)             | cbyd-150807-8         |
| Sra1 <sup>C179R, D-Rac1</sup>       | His6-Tev-Sra1 <sup>C179R</sup> -(GGG) <sub>4</sub> -Rac1 <sup>Q61L/P29S</sup> (1-188) in pAV5a vector, His6-Tev finally removed                                                                            | This study       | pYS196                |
| Nap1                                | His6-Tev-hNap1 (1-1128, full length), in pAV5a vector, His6-Tev finally removed                                                                                                                            | (35)             | pYS2                  |
| WAVE1 (1-230)                       | MBP-Tev-hWAVE1 (1-230) in pMalC2Tev vector, MBP-Tev finally removed                                                                                                                                        | (41)             | pYS8                  |
| WAVE1 (1-230)-WCA                   | MBP-Tev-hWAVE1 (1-230)-(GGG) <sub>6</sub> -WCA(485-559) in pMalC2Tev vector, MBP-Tev finally removed                                                                                                       | (41)             | pYS9                  |
| WAVE1(1-230)-Rac1                   | MBP-Tev-WAVE1 (1-230)-(GGG) <sub>6</sub> -Rac1 <sup>Q61L/P29S</sup> (1-188) in pMalC2Tev vector, MBP-Tev finally removed                                                                                   | (41)             | cbyd-131103-2 (AE9-2) |
| Abi2 (1-158)                        | MBP-Tev-hAbi2 (1-158) in pMalC2Tev vector, MBP-Tev finally removed                                                                                                                                         | (35)             | pYS3                  |

|                                                                         |                                                                                         |                |                                                  |
|-------------------------------------------------------------------------|-----------------------------------------------------------------------------------------|----------------|--------------------------------------------------|
| HSPC300                                                                 | MBP-Tev-hHSPC300 (1-79, full length) in pMalC2Tev vector, MBP-Tev finally removed       | (35)           | pYS4                                             |
| WCA                                                                     | hWAVE1(485-559) in pET11a vector                                                        | (35)           | cbyd-090413-13 (pBC6)                            |
| GST-Arf1                                                                | GST-Thrombin-Arf1 $\Delta^{17}$ (18-181) in pGEX Thrombin vector                        | This study     | pYS30                                            |
| His8-Arf1                                                               | His <sub>8</sub> -(GGS) <sub>2</sub> -Arf1 $\Delta^{17}$ (18-181) in pET11a vector      | This study     | pYS186                                           |
| GST-Arf5                                                                | GST- Thrombin-Arf5 $\Delta^{17}$ (18-180) in pGEX Thrombin vector                       | From Neal Alto | pYS29                                            |
| GST-Arf6                                                                | GST- Thrombin-Arf6 $\Delta^{13}$ (14-175) in pGEX Thrombin vector                       | From Neal Alto | pYS28                                            |
| GST-Arl1                                                                | GST- Thrombin-Arl1 $\Delta^{17}$ (18-181) in pGEX Thrombin vector                       | From Neal Alto | pYS27                                            |
| GST-Arl2                                                                | GST- Thrombin-Arl2 $\Delta^{13}$ (14-184) in pGEX Thrombin vector                       | From Neal Alto | pYS31                                            |
| His6-EspG                                                               | His <sub>6</sub> -EspG <sup>A41</sup> (42-398) in pPROEX HTb vector                     | From Neal Alto | pYS70                                            |
| GST-Rac1 <sup>QP</sup>                                                  | GST-Tev-Rac1 <sup>Q61L/P29S</sup> (1-188) in pGEXTev vector                             | (41)           | pYS7                                             |
| GST-Rac1 <sup>dead</sup>                                                | Switch I (a.a. 25-39) replaced by (GGS) <sub>5</sub> in GST-Rac1                        | This study     | pYS107                                           |
| Untagged Rac1 <sup>QP</sup>                                             | Rac1 <sup>Q61L/P29S</sup> (1-188) in pET11a vector                                      | (41)           | pYS108                                           |
| EGFP-mCyfip1                                                            | EGFP-mCyfip1 in pEGFP vector                                                            | (62)           | pMS1                                             |
| EGFP-mCyfip1 <sup>Y967A</sup>                                           | EGFP-mCyfip1 <sup>Y967A</sup> in pEGFP vector ( $\Delta$ D)                             | (62)           | pMS5                                             |
| EGFP-mCyfip1 <sup>Y986A, E988A</sup>                                    | EGFP-mCyfip1 <sup>Y986A, E988A</sup> in pEGFP vector ( $\Delta$ M#1)                    | This study     | pMS140                                           |
| EGFP-mCyfip1 <sup>Y948A, T951A</sup>                                    | EGFP-mCyfip1 <sup>Y948A, T951A</sup> in pEGFP vector ( $\Delta$ M#2)                    | This study     | pMS141                                           |
| EGFP-mCyfip1 <sup>Y967A, Y986A, E988A</sup>                             | EGFP-mCyfip1 <sup>Y967A, Y986A, E988A</sup> in pEGFP vector ( $\Delta$ D, $\Delta$ M#1) | This study     | pMS156                                           |
| EGFP-mCyfip1 <sup>Y967A, Y948A, T951A</sup>                             | EGFP-mCyfip1 <sup>Y967A, Y948A, T951A</sup> in pEGFP vector ( $\Delta$ D, $\Delta$ M#2) | This study     | pMS157                                           |
| <b>Assembled WRC (refer to the above table for subunit information)</b> |                                                                                         |                |                                                  |
| WRC <sup>230WCA</sup> , or WRC <sup>apo</sup>                           | Sra1, Nap1, WAVE1 (1-230)-WCA, Abi2 (1-158), and HSPC300                                | (41)           | WRC <sup>230WCA</sup> , or WRC <sup>apo</sup>    |
| WRC <sup>D-Rac1</sup>                                                   | Sra1 <sup>D-Rac1</sup> , Nap1, WAVE1 (1-230)-WCA, Abi2 (1-158), and HSPC300             | (46)           | WRC <sup>D-Rac1</sup>                            |
| WRC <sup><math>\Delta\Delta</math>, D-Rac1</sup>                        | Sra1 <sup>C179R, D-Rac1</sup> , Nap1, WAVE1 (1-230)-WCA, Abi2 (1-158), and HSPC300      | This study     | WRC <sup><math>\Delta\Delta</math>, D-Rac1</sup> |
| WRC <sup><math>\Delta</math>M#1</sup>                                   | Sra1 <sup>Y986A, E988A</sup> , Nap1, WAVE1 (1-230)-WCA, Abi2 (1-158), and HSPC300       | This study     | WRC <sup><math>\Delta</math>M#1</sup>            |

|                              |                                                                                   |            |                              |
|------------------------------|-----------------------------------------------------------------------------------|------------|------------------------------|
| WRC <sup>ΔM#2</sup>          | Sra1 <sup>Y948A, T951A</sup> , Nap1, WAVE1 (1-230)-WCA, Abi2 (1-158), and HSPC300 | This study | WRC <sup>ΔM#2</sup>          |
| ΔWRC230                      | Sra1, Nap1, WAVE1 (1-230), Abi2 (1-158), and HSPC300                              | (41)       | ΔWRC230                      |
| ΔWRC230 <sup>D-Rac1</sup>    | Sra1 <sup>D-Rac1</sup> , Nap1, WAVE1 (1-230), Abi2 (1-158), and HSPC300           | (46)       | ΔWRC230 <sup>D-Rac1</sup>    |
| ΔWRC230 <sup>A-Rac1</sup>    | Sra1 <sup>A-Rac1</sup> , Nap1, WAVE1 (1-230), Abi2 (1-158), and HSPC300           | This study | ΔWRC230 <sup>A-Rac1</sup>    |
| ΔWRC230 <sup>AWCA-Rac1</sup> | Sra1, Nap1, WAVE1(1-230)-Rac1, Abi2 (1-158), and HSPC300                          | (41)       | ΔWRC230 <sup>AWCA-Rac1</sup> |
| ΔWRC230 <sup>D-block</sup>   | Sra1 <sup>D-PGS</sup> , Nap1, WAVE1 (1-230), Abi2 (1-158), and HSPC300            | This study | ΔWRC230 <sup>D-block</sup>   |
| ΔWRC230 <sup>A-block</sup>   | Sra1 <sup>A-PGS</sup> , Nap1, WAVE1 (1-230), Abi2 (1-158), and HSPC300            | This study | ΔWRC230 <sup>A-block</sup>   |
| ΔWRC230 <sup>ΔM#1</sup>      | Sra1 <sup>Y986A, E988A</sup> , Nap1, WAVE1 (1-230)-WCA, Abi2 (1-158), and HSPC300 | This study | ΔWRC230 <sup>ΔM#1</sup>      |
| ΔWRC230 <sup>ΔM#2</sup>      | Sra1 <sup>Y948A, T951A</sup> , Nap1, WAVE1 (1-230)-WCA, Abi2 (1-158), and HSPC300 | This study | ΔWRC230 <sup>ΔM#2</sup>      |
| ΔWRC230 <sup>ΔM#3</sup>      | Sra1 <sup>W845A, Y849A</sup> , Nap1, WAVE1 (1-230)-WCA, Abi2 (1-158), and HSPC300 | This study | ΔWRC230 <sup>ΔM#3</sup>      |

**Table S2. Sequences of recombinant proteins used in this study**

|                                                                                                                                                                                                                                                                                                                                                                                                                                                                                                                                                                                                                                                                                                                                                                                                                                                                                                                                                                                                                                                                                                                                                                                                                                                                                                                                                                                                                                                                                                                                                                                                                                                                                                                                                                                                              |
|--------------------------------------------------------------------------------------------------------------------------------------------------------------------------------------------------------------------------------------------------------------------------------------------------------------------------------------------------------------------------------------------------------------------------------------------------------------------------------------------------------------------------------------------------------------------------------------------------------------------------------------------------------------------------------------------------------------------------------------------------------------------------------------------------------------------------------------------------------------------------------------------------------------------------------------------------------------------------------------------------------------------------------------------------------------------------------------------------------------------------------------------------------------------------------------------------------------------------------------------------------------------------------------------------------------------------------------------------------------------------------------------------------------------------------------------------------------------------------------------------------------------------------------------------------------------------------------------------------------------------------------------------------------------------------------------------------------------------------------------------------------------------------------------------------------|
| <p>Only sequences in the final product (i.e., after protease cleavage to remove the affinity tag) are shown.</p>                                                                                                                                                                                                                                                                                                                                                                                                                                                                                                                                                                                                                                                                                                                                                                                                                                                                                                                                                                                                                                                                                                                                                                                                                                                                                                                                                                                                                                                                                                                                                                                                                                                                                             |
| <p><b>&gt;Sra1</b><br/> GAMAAQVTLLEDALSNDLLEELPLPDQQPCIEPPSSLLYQPNFNTNFEDRNAFVTGIARYIEQATVHSSMNEMLEEGQEYAVMLYT<br/> WRSCSRAIPQVKCNEQPNRVEIYEKTEVELEPEVTKLMNFMFYQRNAIERFCGEVRRLLCHAERRKDFVSEAYLITLGGKFINMFAVLD<br/> ELKNMKCSVKNDHSA YKRAAQFLRKMADPQSIQESQNL SMFLANHNKITQSLQQQLEVISGYEELLADIVNLCVDYYENRMYLTPS<br/> EKHMMLKVMGFGLYLMDGSVSNYKLD AKKRINLSKIDKYFKQLQVVPLFGDMQIELARYIKTSAHYEENKSRWCTCTSSGSSPQYNI<br/> CEQMIQIREDHMRFISELARYSNSEVVTGSGRQEAQKTD AEYRKLFDLALQGLQLLSQWSAHVMEVYVSWKLVHPTDKYSNKDCPD<br/> SAEYERATRYNYTSEEKFA LVEVIAMIKGLQVLMGRMESVFNHAI RHTVY AALQDFSQVTLREPLRQA IKKKKNVIQSVLQAI RKT<br/> VCDWETGHEPFNDPALRGEKDPKSGFDIKVPRRAVGPSTQLY MVRTMLES LIADKSGSKTLRSSLEGPTILDIEKFHRESFFYTHLI<br/> NFSETLQCCDLSQLWFRFFLELTMGRRIQFPIEMSMPWILTDHILETKEASMM EYVLYSLDLYNDSAHYALTRFNKQFLYDEIEAE<br/> VNLCFDQFVYKLADQIFAYYKVMAGSLLDKRLRSECKNQGATHLPPSNRYETLLKQRHVQLGRSIDLNRLITQRVSAAMYKSE<br/> LAIGRFES EDTSIVELDGLLEINRMTHKLLSRYLTLDGFDAMFREANHNVSAPYGRITLHVFWELNYDFLPNYCYNGSTNRFVRTV<br/> LPFSQEFQRDKQPNAQPQYLHGSKALNLA YSSYGSYRNFVGP PHFQVICRLLGYQGIAV VMEELLKVVKSLLOGTILQYVKTLM EV<br/> MPKICRLPRHEYGSPGILEFFHHQLKDIVEY AELKTVCFQNLREVGNAILFCLLIEQSLSLEEVCDLLHAAPFQNLPRVHVKEGERLD<br/> AKMKRLESKYAPLHLVPLIERLGT PQQIAIAREGDLLTKERLCCGLSMFEVILTRIRSFDDPIWRG PLPSNGVMHVDECVEFHRLWS<br/> AMQFVY CIPVGTHEFTVEQCFDGLHWAGCMII VLLGQRRFAVLD FCYHLLKVQKHDGKDEIKNVPLKKMVERIRK FQILNDEI I<br/> TILDKYLSKSGDGEGTPVEHVRCFQPIHQSLASS</p>                                                                                                                                                                                                                                                                                                                                                                           |
| <p><b>&gt;Sra1<sup>D-Rac1</sup>, or Sra1-(GGG)<sub>4</sub>-Rac1<sup>Q61L/P29S</sup>(1-188)</b><br/> GAMAAQVTLLEDALSNDLLEELPLPDQQPCIEPPSSLLYQPNFNTNFEDRNAFVTGIARYIEQATVHSSMNEMLEEGQEYAVMLYT<br/> WRSCSRAIPQVKCNEQPNRVEIYEKTEVELEPEVTKLMNFMFYQRNAIERFCGEVRRLLCHAERRKDFVSEAYLITLGGKFINMFAVLD<br/> ELKNMKCSVKNDHSA YKRAAQFLRKMADPQSIQESQNL SMFLANHNKITQSLQQQLEVISGYEELLADIVNLCVDYYENRMYLTPS<br/> EKHMMLKVMGFGLYLMDGSVSNYKLD AKKRINLSKIDKYFKQLQVVPLFGDMQIELARYIKTSAHYEENKSRWCTCTSSGSSPQYNI<br/> CEQMIQIREDHMRFISELARYSNSEVVTGSGRQEAQKTD AEYRKLFDLALQGLQLLSQWSAHVMEVYVSWKLVHPTDKYSNKDCPD<br/> SAEYERATRYNYTSEEKFA LVEVIAMIKGLQVLMGRMESVFNHAI RHTVY AALQDFSQVTLREPLRQA IKKKKNVIQSVLQAI RKT<br/> VCDWETGHEPFNDPALRGEKDPKSGFDIKVPRRAVGPSTQLY MVRTMLES LIADKSGSKTLRSSLEGPTILDIEKFHRESFFYTHLI<br/> NFSETLQCCDLSQLWFRFFLELTMGRRIQFPIEMSMPWILTDHILETKEASMM EYVLYSLDLYNDSAHYALTRFNKQFLYDEIEAE<br/> VNLCFDQFVYKLADQIFAYYKVMAGSLLDKRLRSECKNQGATHLPPSNRYETLLKQRHVQLGRSIDLNRLITQRVSAAMYKSE<br/> LAIGRFES EDTSIVELDGLLEINRMTHKLLSRYLTLDGFDAMFREANHNVSAPYGRITLHVFWELNYDFLPNYCYNGSTNRFVRTV<br/> LPFSQEFQRDKQPNAQPQYLHGSKALNLA YSSYGSYRNFVGP PHFQVICRLLGYQGIAV VMEELLKVVKSLLOGTILQYVKTLM EV<br/> MPKICRLPRHEYGSPGILEFFHHQLKDIVEY AELKTVCFQNLREVGNAILFCLLIEQSLSLEEVCDLLHAAPFQNLPRVHVKEGERLD<br/> AKMKRLESKYAPLHLVPLIERLGT PQQIAIAREGDLLTKERLCCGLSMFEVILTRIRSFDDPIWRG PLPSNGVMHVDECVEFHRLWS<br/> AMQFVY CIPVGTHEFTVEQCFDGLHWAGCMII VLLGQRRFAVLD FCYHLLKVQKHDGKDEIKNVPLKKMVERIRK FQILNDEI I<br/> TILDKYLSKSGDGEGTPVEHVRCFQPIHQSLASSGGSGSGSGSGSMAIKCVVVG DGA VGKTCLLISYTTNAFSGEYIPTVFDNYS<br/> ANVMVDGKPVNLGLWDTAGLEDYDRLRPLSY PQTDFVFLICFSLVSPASFENVR AKWYPEVRHHCNTPHILVGT KLDLDRDDKDTIE<br/> KLKEKKTLPITYPQGLAMAKEIGAVKYLECSALTQRGLKTVFDEAIRAVLCP PPVKKRKRK</p>                                                                      |
| <p><b>&gt;Sra1<sup>A-Rac1</sup> or Sra1 Y423-[(GGG)<sub>6</sub>-Rac1<sup>Q61L/P29S</sup>(1-188)-HRV_3C-(GG)<sub>6</sub>]-S424</b><br/> GAMAAQVTLLEDALSNDLLEELPLPDQQPCIEPPSSLLYQPNFNTNFEDRNAFVTGIARYIEQATVHSSMNEMLEEGQEYAVMLYT<br/> WRSCSRAIPQVKCNEQPNRVEIYEKTEVELEPEVTKLMNFMFYQRNAIERFCGEVRRLLCHAERRKDFVSEAYLITLGGKFINMFAVLD<br/> ELKNMKCSVKNDHSA YKRAAQFLRKMADPQSIQESQNL SMFLANHNKITQSLQQQLEVISGYEELLADIVNLCVDYYENRMYLTPS<br/> EKHMMLKVMGFGLYLMDGSVSNYKLD AKKRINLSKIDKYFKQLQVVPLFGDMQIELARYIKTSAHYEENKSRWCTCTSSGSSPQYNI<br/> CEQMIQIREDHMRFISELARYSNSEVVTGSGRQEAQKTD AEYRKLFDLALQGLQLLSQWSAHVMEVYVSWKLVHPTDKYGGSGGS<br/> GGSGSGSGSGSMQAICV VVG DGA VGKTCLLISYTTNAFSGEYIPTVFDNYSANVMVDGKPVNLGLWDTAGLEDYDRLRPLSY<br/> PQTDVFLICFSLVSPASFENVR AKWYPEVRHHCNTPHILVGT KLDLDRDDKDTIEKLEKKTLPITYPQGLAMAKEIGAVKYLECSAL<br/> TQRGLKTVFDEAIRAVLCP PPVKKRKRKGSLEVL FQGP GSGSGSGSSNKDCPD SAEYERATRYNYTSEEKFA LVEVIAMIKGL<br/> QVLMGRMESVFNHAI RHTVY AALQDFSQVTLREPLRQA IKKKKNVIQSVLQAI RKT VCDWETGHEPFNDPALRGEKDPKSGFDIKV<br/> PRRAVGPSTQLY MVRTMLES LIADKSGSKTLRSSLEGPTILDIEKFHRESFFYTHLI NFSETLQCCDLSQLWFRFFLELTMGRRIQ<br/> FPIEMSMPWILTDHILETKEASMM EYVLYSLDLYNDSAHYALTRFNKQFLYDEIEAEVNLCFDQFVYKLADQIFAYYKVMAGSLL<br/> DKRLRSECKNQGATHLPPSNRYETLLKQRHVQLGRSIDLNRLITQRVSAAMYKSELAIGRFES EDTSIVELDGLLEINRMTHKLL<br/> SRYLTLDGFDAMFREANHNVSAPYGRITLHVFWELNYDFLPNYCYNGSTNRFVRTVLPFSQEFQRDKQPNAQPQYLHGSKALNLA<br/> YSSYGSYRNFVGP PHFQVICRLLGYQGIAV VMEELLKVVKSLLOGTILQYVKTLM EVMPKICRLPRHEYGSPGILEFFHHQLKDIVE<br/> Y AELKTVCFQNLREVGNAILFCLLIEQSLSLEEVCDLLHAAPFQNLPRVHVKEGERLDAKMKRLESKYAPLHLVPLIERLGT PQQIAI<br/> AREGDLLTKERLCCGLSMFEVILTRIRSFDDPIWRG PLPSNGVMHVDECVEFHRLWSAMQFVY CIPVGTHEFTVEQCFDGLHWA<br/> GCMII VLLGQRRFAVLD FCYHLLKVQKHDGKDEIKNVPLKKMVERIRK FQILNDEI I TILDKYLSKSGDGEGTPVEHVRCFQPIHQ S<br/> LASS</p> |
| <p><b>&gt; Sra1<sup>Y986A, E988A</sup></b><br/> GAMAAQVTLLEDALSNDLLEELPLPDQQPCIEPPSSLLYQPNFNTNFEDRNAFVTGIARYIEQATVHSSMNEMLEEGQEYAVMLYT<br/> WRSCSRAIPQVKCNEQPNRVEIYEKTEVELEPEVTKLMNFMFYQRNAIERFCGEVRRLLCHAERRKDFVSEAYLITLGGKFINMFAVLD<br/> ELKNMKCSVKNDHSA YKRAAQFLRKMADPQSIQESQNL SMFLANHNKITQSLQQQLEVISGYEELLADIVNLCVDYYENRMYLTPS<br/> EKHMMLKVMGFGLYLMDGSVSNYKLD AKKRINLSKIDKYFKQLQVVPLFGDMQIELARYIKTSAHYEENKSRWCTCTSSGSSPQYNI<br/> CEQMIQIREDHMRFISELARYSNSEVVTGSGRQEAQKTD AEYRKLFDLALQGLQLLSQWSAHVMEVYVSWKLVHPTDKYSNKDCPD<br/> SAEYERATRYNYTSEEKFA LVEVIAMIKGLQVLMGRMESVFNHAI RHTVY AALQDFSQVTLREPLRQA IKKKKNVIQSVLQAI RKT<br/> VCDWETGHEPFNDPALRGEKDPKSGFDIKVPRRAVGPSTQLY MVRTMLES LIADKSGSKTLRSSLEGPTILDIEKFHRESFFYTHLI</p>                                                                                                                                                                                                                                                                                                                                                                                                                                                                                                                                                                                                                                                                                                                                                                                                                                                                                                                                                                                                                                                                           |



NFSETLQQCCDLSQLWFREFFLELTMGRRIQFPIEMSPWPILTDHILETKEASMMMEYVLYSLDLYNDSAHYALTRFNKQFLYDEIEAE  
VNLCFDQFVYKLDQIFAYYKVMAGSLLLDKRLRSECKNQGATHLPPSNRYETLLKQRHVQLLGRSIDLNRLITQRVSAAMYKSL  
LAIGRFESDLTSIVELDGLLEINRMTHKLLSRYLTDGDFDAMFREANHNVSAPYGRITLHVFWELNYDFLPNYCYNGSTNRFVRTV  
LPFSQEFQRDKQPNAQPQYLHGSKALNLA YSSYGSYRNFVGPFFHQVICRLLGYQGIAVVMEEELLKVVKSLLQGTLQYVKTLMVEV  
MPKICRLPRHEYGSPGILEFFHHQLKDIVEAAALKTVCFQNLREVGNAIFCLLIEQSLSEEVCDLLHAAPFQNLPRVHVKEGERLD  
AKMKRLESKYAPLHLVPLIERLGTQQIAIAREGDLLTKERLCCGLSMFEVILTRIRSFLDDPIWRGPLPSNGVMHVDECVEFHRLWS  
AMQFVYVIPVGTHEFTVEQCFDGLHWAGCMIIVLLGQRRFAVLDFCYHLLKVQKHDGKDEIKNVPLKKMVERIRKQFQILNDEII  
TILDKYLKSGDGEPTVEHVRCFQPIHQSLASS

> **Sra1**<sup>Y948A, T951A</sup>  
GAMAAQVTLLEDALSNDLLEELPLPDQPCIEPPSSLLYQPNFNTNFEDRNAFVTGIARYIEQATVHSSMNEMLEEGQEYAVMLYT  
WRSCSRAIPQVKCNEQPNRVEIYEKTEVELEPEVTKLMNMFYQFQNAIERFCGEVRRLCHAERRKDFVSEAYLITLTKFINMFAVLD  
ELKNMKCSVKNDHSAYKRAAQFLRKMADPQSIQESQNLMSFLANHNKITQSLQQQLEVISGYEELLADIVNLCVDYENRMYLTPS  
EKHMLLKVMGFLYLMDGSVSNYKLDACKRINLSKIDKYFKQLQVVPFLGDMQIELARYIKTSAHYEENKSRWCTSSGSSPQYNI  
CEQMIQIREDHMRFISELARYSNSEVVTGSGRQEAQKTDAYRKLFDLALQGLQLLSQWSAHVMEVYVSWKLVHPTDKYSNKDCPD  
SAEYERATRYNYTSEEKFALEVIAMIKGLQVLMGRMESVFNHAIHRTVY AALQDFSQVTLREPLRQAIAKKNVQSVLQAIKRT  
VCDWETGHEPFNDPALRGEKDPKSGFDIKVPRRAVGPSTQLY MVRTMLESLIADKSGSKTLRSSLEGPTILDIEKFHRESFFYTHLI  
NFSETLQQCCDLSQLWFREFFLELTMGRRIQFPIEMSPWPILTDHILETKEASMMMEYVLYSLDLYNDSAHYALTRFNKQFLYDEIEAE  
VNLCFDQFVYKLDQIFAYYKVMAGSLLLDKRLRSECKNQGATHLPPSNRYETLLKQRHVQLLGRSIDLNRLITQRVSAAMYKSL  
LAIGRFESDLTSIVELDGLLEINRMTHKLLSRYLTDGDFDAMFREANHNVSAPYGRITLHVFWELNYDFLPNYCYNGSTNRFVRTV  
LPFSQEFQRDKQPNAQPQYLHGSKALNLA YSSYGSYRNFVGPFFHQVICRLLGYQGIAVVMEEELLKVVKSLLQGTLQAVKALMEV  
MPKICRLPRHEYGSPGILEFFHHQLKDIVEYAEKTVCFQNLREVGNAIFCLLIEQSLSEEVCDLLHAAPFQNLPRVHVKEGERLD  
AKMKRLESKYAPLHLVPLIERLGTQQIAIAREGDLLTKERLCCGLSMFEVILTRIRSFLDDPIWRGPLPSNGVMHVDECVEFHRLWS  
AMQFVYVIPVGTHEFTVEQCFDGLHWAGCMIIVLLGQRRFAVLDFCYHLLKVQKHDGKDEIKNVPLKKMVERIRKQFQILNDEII  
TILDKYLKSGDGEPTVEHVRCFQPIHQSLASS

> **Sra1**<sup>W845A, Y849A</sup>  
GAMAAQVTLLEDALSNDLLEELPLPDQPCIEPPSSLLYQPNFNTNFEDRNAFVTGIARYIEQATVHSSMNEMLEEGQEYAVMLYT  
WRSCSRAIPQVKCNEQPNRVEIYEKTEVELEPEVTKLMNMFYQFQNAIERFCGEVRRLCHAERRKDFVSEAYLITLTKFINMFAVLD  
ELKNMKCSVKNDHSAYKRAAQFLRKMADPQSIQESQNLMSFLANHNKITQSLQQQLEVISGYEELLADIVNLCVDYENRMYLTPS  
EKHMLLKVMGFLYLMDGSVSNYKLDACKRINLSKIDKYFKQLQVVPFLGDMQIELARYIKTSAHYEENKSRWCTSSGSSPQYNI  
CEQMIQIREDHMRFISELARYSNSEVVTGSGRQEAQKTDAYRKLFDLALQGLQLLSQWSAHVMEVYVSWKLVHPTDKYSNKDCPD  
SAEYERATRYNYTSEEKFALEVIAMIKGLQVLMGRMESVFNHAIHRTVY AALQDFSQVTLREPLRQAIAKKNVQSVLQAIKRT  
VCDWETGHEPFNDPALRGEKDPKSGFDIKVPRRAVGPSTQLY MVRTMLESLIADKSGSKTLRSSLEGPTILDIEKFHRESFFYTHLI  
NFSETLQQCCDLSQLWFREFFLELTMGRRIQFPIEMSPWPILTDHILETKEASMMMEYVLYSLDLYNDSAHYALTRFNKQFLYDEIEAE  
VNLCFDQFVYKLDQIFAYYKVMAGSLLLDKRLRSECKNQGATHLPPSNRYETLLKQRHVQLLGRSIDLNRLITQRVSAAMYKSL  
LAIGRFESDLTSIVELDGLLEINRMTHKLLSRYLTDGDFDAMFREANHNVSAPYGRITLHVFAELNADFLPNYCYNGSTNRFVRTV  
PFSQEFQRDKQPNAQPQYLHGSKALNLA YSSYGSYRNFVGPFFHQVICRLLGYQGIAVVMEEELLKVVKSLLQGTLQYVKTLMVEV  
MPKICRLPRHEYGSPGILEFFHHQLKDIVEYAEKTVCFQNLREVGNAIFCLLIEQSLSEEVCDLLHAAPFQNLPRVHVKEGERLD  
AKMKRLESKYAPLHLVPLIERLGTQQIAIAREGDLLTKERLCCGLSMFEVILTRIRSFLDDPIWRGPLPSNGVMHVDECVEFHRLWS  
AMQFVYVIPVGTHEFTVEQCFDGLHWAGCMIIVLLGQRRFAVLDFCYHLLKVQKHDGKDEIKNVPLKKMVERIRKQFQILNDEII  
TILDKYLKSGDGEPTVEHVRCFQPIHQSLASS

>**Sra1**<sup>D-PGS</sup> or **Sra1 H965-(G)-PGS-(G)-G968**  
GAMAAQVTLLEDALSNDLLEELPLPDQPCIEPPSSLLYQPNFNTNFEDRNAFVTGIARYIEQATVHSSMNEMLEEGQEYAVMLYT  
WRSCSRAIPQVKCNEQPNRVEIYEKTEVELEPEVTKLMNMFYQFQNAIERFCGEVRRLCHAERRKDFVSEAYLITLTKFINMFAVLD  
ELKNMKCSVKNDHSAYKRAAQFLRKMADPQSIQESQNLMSFLANHNKITQSLQQQLEVISGYEELLADIVNLCVDYENRMYLTPS  
EKHMLLKVMGFLYLMDGSVSNYKLDACKRINLSKIDKYFKQLQVVPFLGDMQIELARYIKTSAHYEENKSRWCTSSGSSPQYNI  
CEQMIQIREDHMRFISELARYSNSEVVTGSGRQEAQKTDAYRKLFDLALQGLQLLSQWSAHVMEVYVSWKLVHPTDKYSNKDCPD  
SAEYERATRYNYTSEEKFALEVIAMIKGLQVLMGRMESVFNHAIHRTVY AALQDFSQVTLREPLRQAIAKKNVQSVLQAIKRT  
VCDWETGHEPFNDPALRGEKDPKSGFDIKVPRRAVGPSTQLY MVRTMLESLIADKSGSKTLRSSLEGPTILDIEKFHRESFFYTHLI  
NFSETLQQCCDLSQLWFREFFLELTMGRRIQFPIEMSPWPILTDHILETKEASMMMEYVLYSLDLYNDSAHYALTRFNKQFLYDEIEAE  
VNLCFDQFVYKLDQIFAYYKVMAGSLLLDKRLRSECKNQGATHLPPSNRYETLLKQRHVQLLGRSIDLNRLITQRVSAAMYKSL  
LAIGRFESDLTSIVELDGLLEINRMTHKLLSRYLTDGDFDAMFREANHNVSAPYGRITLHVFWELNYDFLPNYCYNGSTNRFVRTV  
LPFSQEFQRDKQPNAQPQYLHGSKALNLA YSSYGSYRNFVGPFFHQVICRLLGYQGIAVVMEEELLKVVKSLLQGTLQYVKTLMVEV  
MPKICRLPRHEYGSPGILEFFHHQLKDIVEYAEKTVCFQNLREVGNAIFCLLIEQSLSEEVCDLLHAAPFQNLPRVHVKEGERLD  
AKMKRLESKYAPLHLVPLIERLGTQQIAIAREGDLLTKERLCCGLSMFEVILTRIRSFLDDPIWRGPLPSNGVMHVDECVEFHRLWS  
AMQFVYVIPVGTHEFTVEQCFDGLHWAGCMIIVLLGQRRFAVLDFCYHLLKVQKHDGKDEIKNVPLKKMVERIRKQFQILNDEII  
TILDKYLKSGDGEPTVEHVRCFQPIHQSLASS

>**Sra1**<sup>A-PGS</sup> or **K178-(G)-PGS-(G)-S180**  
GAMAAQVTLLEDALSNDLLEELPLPDQPCIEPPSSLLYQPNFNTNFEDRNAFVTGIARYIEQATVHSSMNEMLEEGQEYAVMLYT  
WRSCSRAIPQVKCNEQPNRVEIYEKTEVELEPEVTKLMNMFYQFQNAIERFCGEVRRLCHAERRKDFVSEAYLITLTKFINMFAVLD  
ELKNMKGGIDCSFVNESYLTGSRDERKKSLLSKFGMDEGVTFMFIGRFRDQKGVVDVLLKAIIEILSSKKEFQEMRFIIIGKGDPELEG  
WARSLEEKHGNVAVITMELSRFVRELYGSVDFVIIPSYFEPFGLVALEAMCLGAIPIASAVGGLRDIITNETGILVKAGDPGELANAI  
LKALELSRDLKSFRENCKKRAMSFSGSGPILGFFHHQLKDIVEYAEKTVCFQNLREVGNAIFCLLIEQSLSEEVCDLLHAA  
PFQNLPRVHVKEGERLDAKMKRLESKYAPLHLVPLIERLGTQQIAIAREGDLLTKERLCCGLSMFEVILTRIRSFLDDPIWRGPLPSN  
GVMHVDECVEFHRLWSAMQFVYVIPVGTHEFTVEQCFDGLHWAGCMIIVLLGQRRFAVLDFCYHLLKVQKHDGKDEIKNVPL  
KKMVERIRKQFQILNDEIITILDKYLKSGDGEPTVEHVRCFQPIHQSLASS

YSWKL VHPD KYSNKDCPDSAEYERATRYNYTSEEK FALVEVIAMIKGLQVLMGRMESVFNHAI RHTVYAALQDFSQVTLREPLR  
QAIKKKKNVIQSVLQAI RKT VCDWETGHEPFNDPALRGEKDPKSGFDIKVPRRAVGPSS TQLYMVRTMLES LIADKSGSKTLRSSL  
EGPTIL DIEKFHRESFFYTHLINFSETLQCCDLSQLWFR EFFLELTMGRRIQFPIEMSPWILTDHILETKEASMM EYVLYSLDLYND  
SAHYALTRFNKQFLYDEIEAEVNLCFDQFVYK LADQIFAYYKVMAGSLLLDKRLRSECKNQGATHLPPSNRYETLLKQRHVQLLG  
RSIDLNRLITQRVSAAMYKSLELAIGRFESEDLTSIVELDGLLEINRMTHKLLSRYLTLDGFDAMFREANHNVSAPYGRITLHVFWEL  
NYDFLPNYCYNGSTNRFRVTVLPFSQEFQRDKQPNAQPQYLHGSKALNLA YSSYGSYRN FVGPFFHQVICRLLGYQGIAVVM EELL  
KVVKSLLOGTILQYVKTLM EVMPIKICRLPRHEYGSPGILEFFHHQLKDIVEY AELKTVCFQNLREVGNAILFCLLIEQSL SLEEVCDLL  
HAAPFQNILPRVHVKEGERLDAKMKRLESKYAPLHLVPLIERLGT PQQIAIAREGDLLTKERLCCGLSMFEVILTRIRSFLDDPIWRGP  
LPSNGVMHVDECEVFEHRLWSAMQFVY CIPVGTHEFTVEQCFGDGLHWAGCMIIVLLGQRRFAVLDFCYHLLKVQKHDGKDEI IK  
NVPLKMMVERIRK FQILNDEIITILD KYLKS GGDGEGTPVEHVRFCFPPIHQSLASS

>Sra1<sup>Y967A</sup>

GAMAAQVTL EDALSNDLLEELPLPDQPCIEPPSSLLYQPNFNTNFEDRNAFVTGIARYIEQATVHSSMNEMLEEGQEYAVMLYT  
WRSCSRAIPQVKCNEQPNRVEIYEKTVEVLEPEVTKLMNFMFYQRNAIERFCGEVRR LCHAERRKDFVSEAYLITLGKFINMFVAVLD  
ELKNMKCSVKNDHSAYKRAAQFLRKMADPQSIQESQNSMFLANHNKITQSLQQQLEVISGYEELLADIVNLCVDY YENRMYLTPS  
EKHMLLKVMGFGLYLM DGSVSNYKLD AKKRINLSKIDKYFKQLQVVP LFGDMQIELARYIKTSAHYEENKSRWCTSSGSSPQYNI  
CEQMIQIREDHMRFISELARYSNSEVVTGSGRQEAQKTD AEYRKLFDLALQGLQLLSQWSAHVMEVY SWKLVHPTDKYSNKDCPD  
SAEYERATRYNYTSEEK FALVEVIAMIKGLQVLMGRMESVFNHAI RHTVYAALQDFSQVTLREPLRQA IKKKNVIQSVLQAI RKT  
VCDWETGHEPFNDPALRGEKDPKSGFDIKVPRRAVGPSS TQLYMVRTMLES LIADKSGSKTLRSSLEGP TILDIEKFHRESFFYTHL  
NFSETLQCCDLSQLWFR EFFLELTMGRRIQFPIEMSPWILTDHILETKEASMM EYVLYSLDLYNDSAHYALTRFNKQFLYDEIEAE  
VNLCFDQFVYK LADQIFAYYKVMAGSLLLDKRLRSECKNQGATHLPPSNRYETLLKQRHVQLLGRSIDLNRLITQRVSAAMYKSLE  
LAIGRFESEDLTSIVELDGLLEINRMTHKLLSRYLTLDGFDAMFREANHNVSAPYGRITLHVFWELNYDFLPNYCYNGSTNRFRVTV  
LPFSQEFQRDKQPNAQPQYLHGSKALNLA YSSYGSYRN FVGPFFHQVICRLLGYQGIAVVM EELLKVVKSLLOGTILQYVKTLM E  
VMPKICRLPRHEAGSPGILEFFHHQLKDIVEY AELKTVCFQNLREVGNAILFCLLIEQSL SLEEVCDLLHAAPFQNILPRVHVKEGERLD  
AKMKRLESKYAPLHLVPLIERLGT PQQIAIAREGDLLTKERLCCGLSMFEVILTRIRSFLDDPIWRGPLPSNGVMHVDECEVFEHRLWS  
AMQFVY CIPVGTHEFTVEQCFGDGLHWAGCMIIVLLGQRRFAVLDFCYHLLKVQKHDGKDEI IKNVPLKMMVERIRK FQILNDEI  
TILD KYLKS GGDGEGTPVEHVRFCFPPIHQSLASS

>Sra1<sup>C179R</sup>

GAMAAQVTL EDALSNDLLEELPLPDQPCIEPPSSLLYQPNFNTNFEDRNAFVTGIARYIEQATVHSSMNEMLEEGQEYAVMLYT  
WRSCSRAIPQVKCNEQPNRVEIYEKTVEVLEPEVTKLMNFMFYQRNAIERFCGEVRR LCHAERRKDFVSEAYLITLGKFINMFVAVLD  
ELKNMKRSVKNDHSAYKRAAQFLRKMADPQSIQESQNSMFLANHNKITQSLQQQLEVISGYEELLADIVNLCVDY YENRMYLTPS  
EKHMLLKVMGFGLYLM DGSVSNYKLD AKKRINLSKIDKYFKQLQVVP LFGDMQIELARYIKTSAHYEENKSRWCTSSGSSPQYNI  
CEQMIQIREDHMRFISELARYSNSEVVTGSGRQEAQKTD AEYRKLFDLALQGLQLLSQWSAHVMEVY SWKLVHPTDKYSNKDCPD  
SAEYERATRYNYTSEEK FALVEVIAMIKGLQVLMGRMESVFNHAI RHTVYAALQDFSQVTLREPLRQA IKKKNVIQSVLQAI RKT  
VCDWETGHEPFNDPALRGEKDPKSGFDIKVPRRAVGPSS TQLYMVRTMLES LIADKSGSKTLRSSLEGP TILDIEKFHRESFFYTHL  
NFSETLQCCDLSQLWFR EFFLELTMGRRIQFPIEMSPWILTDHILETKEASMM EYVLYSLDLYNDSAHYALTRFNKQFLYDEIEAE  
VNLCFDQFVYK LADQIFAYYKVMAGSLLLDKRLRSECKNQGATHLPPSNRYETLLKQRHVQLLGRSIDLNRLITQRVSAAMYKSLE  
LAIGRFESEDLTSIVELDGLLEINRMTHKLLSRYLTLDGFDAMFREANHNVSAPYGRITLHVFWELNYDFLPNYCYNGSTNRFRVTV  
LPFSQEFQRDKQPNAQPQYLHGSKALNLA YSSYGSYRN FVGPFFHQVICRLLGYQGIAVVM EELLKVVKSLLOGTILQYVKTLM E  
VMPKICRLPRHEYGSPGILEFFHHQLKDIVEY AELKTVCFQNLREVGNAILFCLLIEQSL SLEEVCDLLHAAPFQNILPRVHVKEGERLD  
AKMKRLESKYAPLHLVPLIERLGT PQQIAIAREGDLLTKERLCCGLSMFEVILTRIRSFLDDPIWRGPLPSNGVMHVDECEVFEHRLWS  
AMQFVY CIPVGTHEFTVEQCFGDGLHWAGCMIIVLLGQRRFAVLDFCYHLLKVQKHDGKDEI IKNVPLKMMVERIRK FQILNDEI  
TILD KYLKS GGDGEGTPVEHVRFCFPPIHQSLASS

>Sra1<sup>C179R, D-Rac1</sup>, or Sra1<sup>C179R</sup>-(GGS)<sub>4</sub>-Rac1<sup>O61L/P29S</sup>(1-188)

GAMAAQVTL EDALSNDLLEELPLPDQPCIEPPSSLLYQPNFNTNFEDRNAFVTGIARYIEQATVHSSMNEMLEEGQEYAVMLYT  
WRSCSRAIPQVKCNEQPNRVEIYEKTVEVLEPEVTKLMNFMFYQRNAIERFCGEVRR LCHAERRKDFVSEAYLITLGKFINMFVAVLD  
ELKNMKRSVKNDHSAYKRAAQFLRKMADPQSIQESQNSMFLANHNKITQSLQQQLEVISGYEELLADIVNLCVDY YENRMYLTPS  
EKHMLLKVMGFGLYLM DGSVSNYKLD AKKRINLSKIDKYFKQLQVVP LFGDMQIELARYIKTSAHYEENKSRWCTSSGSSPQYNI  
CEQMIQIREDHMRFISELARYSNSEVVTGSGRQEAQKTD AEYRKLFDLALQGLQLLSQWSAHVMEVY SWKLVHPTDKYSNKDCPD  
SAEYERATRYNYTSEEK FALVEVIAMIKGLQVLMGRMESVFNHAI RHTVYAALQDFSQVTLREPLRQA IKKKNVIQSVLQAI RKT  
VCDWETGHEPFNDPALRGEKDPKSGFDIKVPRRAVGPSS TQLYMVRTMLES LIADKSGSKTLRSSLEGP TILDIEKFHRESFFYTHL  
NFSETLQCCDLSQLWFR EFFLELTMGRRIQFPIEMSPWILTDHILETKEASMM EYVLYSLDLYNDSAHYALTRFNKQFLYDEIEAE  
VNLCFDQFVYK LADQIFAYYKVMAGSLLLDKRLRSECKNQGATHLPPSNRYETLLKQRHVQLLGRSIDLNRLITQRVSAAMYKSLE  
LAIGRFESEDLTSIVELDGLLEINRMTHKLLSRYLTLDGFDAMFREANHNVSAPYGRITLHVFWELNYDFLPNYCYNGSTNRFRVTV  
LPFSQEFQRDKQPNAQPQYLHGSKALNLA YSSYGSYRN FVGPFFHQVICRLLGYQGIAVVM EELLKVVKSLLOGTILQYVKTLM E  
VMPKICRLPRHEYGSPGILEFFHHQLKDIVEY AELKTVCFQNLREVGNAILFCLLIEQSL SLEEVCDLLHAAPFQNILPRVHVKEGERLD  
AKMKRLESKYAPLHLVPLIERLGT PQQIAIAREGDLLTKERLCCGLSMFEVILTRIRSFLDDPIWRGPLPSNGVMHVDECEVFEHRLWS  
AMQFVY CIPVGTHEFTVEQCFGDGLHWAGCMIIVLLGQRRFAVLDFCYHLLKVQKHDGKDEI IKNVPLKMMVERIRK FQILNDEI  
TILD KYLKS GGDGEGTPVEHVRFCFPPIHQSLASSGGSGGSGGSGSMQAICV VVGDAVGKTCLLISYTTNAFSGEYIPTVFDNYS  
ANVMVDGKPVNGLWDTAGLEDYDRLRPLSYPTDVF LICFSLVSPASFENVR AKWYPEVRHHCNTPHILVGT KLDLRDDKDTIE  
KLKEKLTPTIPYQGLAMAKEIGAVKYLECSALTQRGLKTVFDEAIRAVLCP PPKRKRK

>Nap1

GAMSRSVLQPSQQLAEKLTILNDRGVGMLTRLYNIKKACGDPKAKPSYLIDKNLES AVK FIVRKFPAVETRNNQQLAQLQKEKS  
EILKNLALYYFTFDVDMFEKDHVCELLNTIDVCCVFFDITVNF DLTKNYLDLIITYTLMILLSRIEERKAIIGLYNYAHEMTHGASDR  
EYRGLGQMIVDYENPLKMMEEFVPHSKSLSDALISLQMVYPRNLSADQWRNAQLLSLISAPSTMLNPAQSDTMPCEYLSLDAME  
KWIIFGILCHGILNTDATALNWKLALQSSSCLSLFRDEVFHIHKAEDLQVFNIRGYNKRINDIRECKEAAVSHAGSMHRRERKFLR  
SALKELATVLS DQPGLLGPKALFVFMALSFARDEIHWLLRHADNMPKKSADDFIDKHIAELIFYMEELRAHV RKYGPVMQRYVYQY

|                                                                                                                                                                                                                                                                                                                                                                                                                                                                                                                                                                                                                                                                                                                                                                       |
|-----------------------------------------------------------------------------------------------------------------------------------------------------------------------------------------------------------------------------------------------------------------------------------------------------------------------------------------------------------------------------------------------------------------------------------------------------------------------------------------------------------------------------------------------------------------------------------------------------------------------------------------------------------------------------------------------------------------------------------------------------------------------|
| <p>LSGFDVAVLNLVQNLVCPEDESIIMSSFVNTMTSLSVKQVEDGEVDFRGMRLDWFRLQAYTSVSKASLGLADHRELGKMMNTI<br/> IFHTKMVDSLVEMLVETSLSIFCFYSRAFEKMFQQCLELPSQSRYSIAFPLLC THFMSC THELCPEERHHIGDRSLSLCNMFLDEMA<br/> KQARNLITDICTEQCTLSDQLPKHCAKTISQAVNKKSKKQTGKKGEPEREKPGVESMRKNRLVVTNLDKLHTALSELCSFINSYVPN<br/> MVVWEHTFTPREYLTSHLEIRFTKSIVGMTMYNQATQEIAPSELLTSVRAYMTVLQSIENYVQIDITRVFNNVLLQQTQHLDSHGE<br/> PTITSLYTNWYLETLLRQVSNGHIAFYFPAMKAFVNLPTENELTFNAEEYSDISEMRSLSELLGPYGMKFLSESLMWHISSQVAELKKL<br/> VVENVDLTQMRTSFDKPDQMAALFKRLSSVDSVLKRMITIGVILSFRSLAQEALRDVLSYHIPFLVSSIEDFKDHIPRETDKMKVAMN<br/> VYELSSAAGLPCEIDPALVVALSSQKSENISPEEYKIACLLMVFVAVSLPTLASNVMSQYSPAIEGHCCNIHCLAKAINQIAAALFTIH<br/> KGSIEDRLKEFLALASSLLKIGQETDKTTRNRRESVYLLDMIVQESPFLLTMDLLESCFPYVLLRNAYHA VYKQSVTSSA</p> |
| <p><b>&gt;WAVE1 (1-230)</b><br/> GHMPLVKNRNDPRHLCHTALPRGIKNELECVTNISLANIIRQLSSLSKYAEDIFGELFNEAHSFSFRVNSLQERVDRLSVSVTQLDPKEE<br/> ELSLQDITMRKAFRSTIQDQQLFDRKTLPIPLQETYDVCEQPPLNLTYPYRDDGKEGLKFYTNPSYFFDLWKEKMLQDTEDKRKEK<br/> RKQKQKNLDRPHEPEKVPRAPHDRRREWQKLAQGPELAEDDANLLHKHIEVANG</p>                                                                                                                                                                                                                                                                                                                                                                                                                                                                               |
| <p><b>&gt;WAVE1 (1-230)-WCA, or WAVE1 (1-230)-(GGS)<sub>6</sub>-WCA(485-559)</b><br/> GHMPLVKNRNDPRHLCHTALPRGIKNELECVTNISLANIIRQLSSLSKYAEDIFGELFNEAHSFSFRVNSLQERVDRLSVSVTQLDPKEE<br/> ELSLQDITMRKAFRSTIQDQQLFDRKTLPIPLQETYDVCEQPPLNLTYPYRDDGKEGLKFYTNPSYFFDLWKEKMLQDTEDKRKEK<br/> RKQKQKNLDRPHEPEKVPRAPHDRRREWQKLAQGPELAEDDANLLHKHIEVANGGGSGSGSGSGSGSGSGSKRHPSTLPVISD<br/> ARSVLEAIRKGIQLRKVEEQREAEKHERIENDVATILSRRIA VEYSDEDDSEFDEVDWLE</p>                                                                                                                                                                                                                                                                                                                          |
| <p><b>&gt;WAVE1 (1-230)-Rac1, or WAVE1 (1-230)-(GGS)<sub>6</sub>-Rac1<sup>Q61L/P29S</sup> (1-188)</b><br/> GHMPLVKNRNDPRHLCHTALPRGIKNELECVTNISLANIIRQLSSLSKYAEDIFGELFNEAHSFSFRVNSLQERVDRLSVSVTQLDPKEE<br/> ELSLQDITMRKAFRSTIQDQQLFDRKTLPIPLQETYDVCEQPPLNLTYPYRDDGKEGLKFYTNPSYFFDLWKEKMLQDTEDKRKEK<br/> RKQKQKNLDRPHEPEKVPRAPHDRRREWQKLAQGPELAEDDANLLHKHIEVANGGGSGSGSGSGSGSGSGSMQAIKCVVVG<br/> GAVGKTCLLISYTTNAFSGEYIPTVFDNYSANVMVDGKPVNLGLWDTAGLEDYDRLRPLSYPTDVFLLICFSLVSPASFENVRAKW<br/> YPEVRRHCPNTPILVGTGLDRDDKDTIEKLEKELKTPITYPQLAMAKEIGAVKYLECSALTQRGLKTVFDEAIRAVLCPVPVKR<br/> KRK</p>                                                                                                                                                                           |
| <p><b>&gt;Abi2 (1-158)</b><br/> GHMAELQMLLEEIPGGRRALFDSYTNLERVADYCENNYIQSADKQRALEETKAYTTQSLASVAYLINTLANNVLQMLDIQASQLR<br/> RMESINHISQTVDIHKEKVARREIGILTNNKNTSRTHKIAPANLERPVRYIRKPIDYTILDDIGHGVKYSTQ</p>                                                                                                                                                                                                                                                                                                                                                                                                                                                                                                                                                               |
| <p><b>&gt;HSPC300</b><br/> GHMGAAMAGQEDPVQREIHQDWANREYIEIITSSIKKIADFLNSFDMSCRSRLATLNEKLTALERRIEYIEARVTKGETLT</p>                                                                                                                                                                                                                                                                                                                                                                                                                                                                                                                                                                                                                                                      |
| <p><b>&gt;WCA</b><br/> KRHPSTLPVISDARSVLEAIRKGIQLRKVEEQREAEKHERIENDVATILSRRIA VEYSDEDDSEFDEVDWLE</p>                                                                                                                                                                                                                                                                                                                                                                                                                                                                                                                                                                                                                                                                  |
| <p><b>&gt; GST-Arf1</b><br/> MSPILGYWKIKGLVQPTRLLLEYLEEKYEEHLYERDEGDKWRNKKFELGLEFPNLPYYIDGDVVKLTQSMAIIRYIADKHNMLGGCP<br/> KERAESMLEGAVLDIRYGVSRIAYSKDFETLKVDVFLSKLPEMLKMFEDRLCHKTYLNGDHVTHPDFMLYDALDVVLYMDPMCLD<br/> AFPKLVCFKKRIEAIQIDKYLKSSKYIAWPLQGWQATFGGGDHPPKSDLVPRGSMRILMVGLDAAAGKTTILYKLLKGEIVTTIPTIGF<br/> NVETVEYKNISFTVWVGGQDKIRPLWRHYFQNTQGLIFVVDSDNRERVNEAREELMRMLAEDELDAVLLVFANKQDLPNAMN<br/> AAEITDKLGLHSLRHRNWIYQATCATSGDGLYEGLDWLSNQLRNQK</p>                                                                                                                                                                                                                                                                                                        |
| <p><b>&gt; His8-Arf1</b><br/> HHHHHHHHGGSGGSMRILMVGLDAAAGKTTILYKLLKGEIVTTIPTIGFNVETVEYKNISFTVWVGGQDKIRPLWRHYFQNTQGLIF<br/> VVDSDNRERVNEAREELMRMLAEDELDAVLLVFANKQDLPNAMNAAEITDKLGLHSLRHRNWIYQATCATSGDGLYEGLDWLS<br/> NQLRNQK</p>                                                                                                                                                                                                                                                                                                                                                                                                                                                                                                                                       |
| <p><b>&gt; His6-EspG</b><br/> MSYHHHHHHHDYDIPTTENLYFQGAMGSKKSWDEMCAEKLKFKVLSFGLWNPTYSRERQSFQELLTVLEPVYPLPNELGRVSARF<br/> SDGSSLRISVTNSELVEAEIRTANNEKITVLESNEQNRLQLPIDRHMPYIQVHRALSEMDLTDTTSMRNLLGFTSKLSTTLIPHNA<br/> QTDPLSGPTPFSSIFMDTCRGLGNAKLSLNGVDIPANAQKLLRDALGLKDTHTSSPTRNVIDHGISRHDAEQIARESSGSDKQKAEVVE<br/> FLCHPEAATAICSAFYQSFNPALTLTHERISKASEYNAERSLDTPNACINISISQSSDGNIVYVTSHTGVLIMAPEDRPNEMGMLTNRTS<br/> YEVPOGVKCIIDEMVSALQPRYAASETYLQNT</p>                                                                                                                                                                                                                                                                                                              |
| <p><b>&gt; GST-Arf5</b><br/> MSPILGYWKIKGLVQPTRLLLEYLEEKYEEHLYERDEGDKWRNKKFELGLEFPNLPYYIDGDVVKLTQSMAIIRYIADKHNMLGGCP<br/> KERAESMLEGAVLDIRYGVSRIAYSKDFETLKVDVFLSKLPEMLKMFEDRLCHKTYLNGDHVTHPDFMLYDALDVVLYMDPMCLD<br/> AFPKLVCFKKRIEAIQIDKYLKSSKYIAWPLQGWQATFGGGDHPPKSDLVPRGSMRILMVGLDAAAGKTTILYKLLKGEIVTTIPTIGF<br/> NVETVEYKNICFTVWVGGQDKIRPLWRHYFQNTQGLIFVVDSDNRERVQESADELQKMLQEDELDAVLLVFANKQDMPNAMP<br/> VSELTDKLGLQHLRSRTWYVQATCATQGTGLYDGLDWLSHELKSR</p>                                                                                                                                                                                                                                                                                                         |
| <p><b>&gt; GST-Arf6</b><br/> MSPILGYWKIKGLVQPTRLLLEYLEEKYEEHLYERDEGDKWRNKKFELGLEFPNLPYYIDGDVVKLTQSMAIIRYIADKHNMLGGCP<br/> KERAESMLEGAVLDIRYGVSRIAYSKDFETLKVDVFLSKLPEMLKMFEDRLCHKTYLNGDHVTHPDFMLYDALDVVLYMDPMCLD<br/> AFPKLVCFKKRIEAIQIDKYLKSSKYIAWPLQGWQATFGGGDHPPKSDLVPRGSMRILMLGLDAAAGKTTILYKLLKQSVTTIPTVG<br/> FNVETVYKKNVFNWVWVGGQDKIRPLWRHYTGTQGLIFVVDCAADRDRIDEARQELHRIINDREMRDAIILIFANKQDLPDAMKP<br/> HEIQEKLGLTRIRDRNWIYVQSCATSGDGLYEGLTWLSNYKS</p>                                                                                                                                                                                                                                                                                                           |
| <p><b>&gt; GST-Arf11</b><br/> MSPILGYWKIKGLVQPTRLLLEYLEEKYEEHLYERDEGDKWRNKKFELGLEFPNLPYYIDGDVVKLTQSMAIIRYIADKHNMLGGCP<br/> KERAESMLEGAVLDIRYGVSRIAYSKDFETLKVDVFLSKLPEMLKMFEDRLCHKTYLNGDHVTHPDFMLYDALDVVLYMDPMCLD</p>                                                                                                                                                                                                                                                                                                                                                                                                                                                                                                                                                  |

AFPKLVCFKKRIEAIQIDKYLKSSKYIAWPLQGWQATFGGGDHPPKSDLVPRGSMRILILGLDGAGKTILYRLQVGEVVTIPTIGF  
NVETVYKLNKQVWDLGGQTSIRPYWRCYYSNTDAVIYVVDSCDRDRIGISKSELVAMLEEEELRKAILVVFANKQDMEQAMTSS  
EMANSLGLPALKDRKWQIFKTSATKGTGLDEAMEWL VETLKS RQ

> **GST-Arl2**

MSPILGYWKIKGLVQPTRLLEYLEEKYEEHL YERDEGDKWRNKKFELGLEFPNLPYYIDGDV KLTQSM AIIRYIADKH NMLGGCP  
KERA EISMLEGAVLDIRYGVSR IAYS KDFETLKVDFLSKLP EMLKMFEDRLCHKTYLNGDHVTHPDFM LYDALDVVLYMDPMCLD  
AFPKLVCFKKRIEAIQIDKYLKSSKYIAWPLQGWQATFGGGDHPPKSDLVPRGSE RELRLLMLGLDNAGKTILKKFNGEDIDTISP  
TLGFNIKLEHRGFKLNIWDVGGQKSLRSYWRNYFESTDGLI WVVD SADRQRMQDCQRELQSL LVEERLAGATLLIFANKQDLPGA  
LSSNAIREALELDSIRSHHCWCIQGCSAVTGENLLPGIDWLLDDISSRIFTAD

> **GST-Rac1<sup>OP</sup> or GST-Tev-Rac1<sup>Q61L/P29S</sup>(1-188)**

MSPILGYWKIKGLVQPTRLLEYLEEKYEEHL YERDEGDKWRNKKFELGLEFPNLPYYIDGDV KLTQSM AIIRYIADKH NMLGGCP  
KERA EISMLEGAVLDIRYGVSR IAYS KDFETLKVDFLSKLP EMLKMFEDRLCHKTYLNGDHVTHPDFM LYDALDVVLYMDPMCLD  
AFPKLVCFKKRIEAIQIDKYLKSSKYIAWPLQGWQATFGGGDHPPKSDLVPRGSE NLYFQGHMQAIKCVVVG DGAVGKTCLLISYT  
TNAFSGEYIPTVFDNYSANVMVDGKPVNLGLWDTAGLEDYDRLRPLSYPTDVF LICFSLVSPASFENVRAKWYPEVRHHCNP TPII  
LVGTKL DLRDDKDTIEKLEK KLTPIY PQGLAMAKEIGAVKYLECSALTQRGLKTVFDEAIRAVLCPPPVKKRKRK

> **GST-Rac1<sup>dead</sup> or GST-Tev-Rac1(1-188)**, with Switch I (a.a. 25-39) replaced by (GGS)s

MSPILGYWKIKGLVQPTRLLEYLEEKYEEHL YERDEGDKWRNKKFELGLEFPNLPYYIDGDV KLTQSM AIIRYIADKH NMLGGCP  
KERA EISMLEGAVLDIRYGVSR IAYS KDFETLKVDFLSKLP EMLKMFEDRLCHKTYLNGDHVTHPDFM LYDALDVVLYMDPMCLD  
AFPKLVCFKKRIEAIQIDKYLKSSKYIAWPLQGWQATFGGGDHPPKSDLVPRGSE NLYFQGHMQAIKCVVVG DGAVGKTCLLISYT  
**GSGSGSGSGSGS**YSANVMVDGKPVNLGLWDTAGLEDYDRLRPLSYPTDVF LICFSLVSPASFENVRAKWYPEVRHHCNP TPII  
LVGTKL DLRDDKDTIEKLEK KLTPIY PQGLAMAKEIGAVKYLECSALTQRGLKTVFDEAIRAVLCPPPVKKRKRK

> **Rac1<sup>OP</sup> or Rac1<sup>Q61L/P29S</sup>(1-188)**

MQAIKCVVVG DGAVGKTCLLISYTTNAFSGEYIPTVFDNYSANVMVDGKPVNLGLWDTAGLEDYDRLRPLSYPTDVF LICFSLVS  
PASFENVRAKWYPEVRHHCNP TPII LVGTKL DLRDDKDTIEKLEK KLTPIY PQGLAMAKEIGAVKYLECSALTQRGLKTVFDEAIR  
AVLCPPPVKKRKRK

**Movie S1. Lamellipodia protrusion efficiency in cells harboring wildtype WRC *versus* WRC deficient in Arf-binding or D site Rac binding or both.** Phase-contrast time-lapse microscopy of B16-F1 Sra1/Cyfp2-KO#3 cells expressing constructs as indicated. Movie was accelerated 100 times.

**Movie S2. Random cell migration in cells harboring wildtype WRC *versus* WRC deficient in Arf-binding or D site Rac binding or both.** Low-mag phase contrast video microscopy of B16-F1 Sra1/Cyfp2-KO#3 cells expressing constructs as indicated. Movie was accelerated 100 times.
